1 Spatial, climate, and ploidy factors drive genomic diversity and resilience in the  
2 widespread grass *Themeda triandra*

3

4 Ahrens CW<sup>1,2</sup>, James EA<sup>2</sup>, Miller AD<sup>3</sup>, Aitken NC<sup>4</sup>, Borevitz JO<sup>4</sup>, Cantrill DJ<sup>2</sup>, Rymer PD<sup>1</sup>

5

6 <sup>1</sup> Hawkesbury Institute for the Environment, Western Sydney University, Richmond NSW

7 <sup>2</sup> Royal Botanic Gardens Victoria, Melbourne, VIC, Australia

8 <sup>3</sup> Deakin University, Warrnambool, VIC, Australia

9 <sup>4</sup> Research School of Biology, Australian National University, Canberra, ACT, Australia

10

11 Author Correspondence:

12 Collin Ahrens

13 Email: [c.ahrens@westernsydney.edu.au](mailto:c.ahrens@westernsydney.edu.au)

14 Phone: +61 2 4570 1862

15

16 Word Count:

17 Summary – 195

18 Introduction – 1393

19 Methods – 2352

20 Results – 711

21 Conclusions – 1896

22 Total – 6352

23

24 **Summary**

25 •Fragmented grassland ecosystems, and the species that shape them, are under immense pressure.  
26 Restoration and management strategies should include genetic diversity and adaptive capacity to  
27 improve success but these data are generally unavailable. Therefore, we use the foundational grass,  
28 *Themeda triandra*, to test how spatial, environmental, and ploidy factors shape patterns of genetic  
29 variation.

30

31 •We used reduced-representation genome sequencing on 487 samples from 52 locations to answer  
32 fundamental questions about how the distribution of genomic diversity and ploidy polymorphism  
33 supports adaptation to harsher climates. We explicitly quantified isolation-by-distance (IBD),  
34 isolation-by-environment (IBE), and predicted population genomic vulnerability in 2070.

35

36 •We found that a majority (54%) of the genomic variation could be attributed to IBD, while 22% of  
37 the genomic variation could be explained by four climate variables showing IBE. Results indicate  
38 that heterogeneous patterns of vulnerability across populations are due to genetic variation, multiple  
39 climate factors, and ploidy polymorphism, which lessened genomic vulnerability in the most  
40 susceptible populations.

41

42 •These results indicate that restoration and management of *T. triandra* should incorporate knowledge  
43 of genomic diversity and ploidy polymorphisms to increase the likelihood of population persistence  
44 and restoration success in areas that will become hotter and more arid.

45

#### 46 Key words

47 adaptation; genomic diversity; genomic vulnerability; landscape genomics; polyploidy; restoration;  
48 *Themeda triandra* (kangaroo grass)

49

50

## 51 Introduction

52 Grasses (Poaceae) are one of the most ecologically important vascular plant groups, making up 25%  
53 of the world's vegetation (Shantz, 1954). They provide key ecosystem services that underpin  
54 environmental health (i.e. habitat and food sources for native wildlife, nutrient cycling and carbon  
55 sequestration), and carry significant economic value as they include four of the five major crops in  
56 terms of global production (Raven & Thomas, 2010). Grasses are essential constituents of several  
57 vegetation communities including grasslands, grassy woodlands, and alpine regions. However,  
58 grasslands and grassy woodlands have historically been under immense pressure from rangeland and  
59 agricultural uses (Eldridge *et al.*, 2016; Hopkins & Holz 2006), leading to the fragmentation of natural  
60 populations and reductions in genetic diversity (Harrison *et al.*, 2015). Today, only about 4.6% of the  
61 billions of hectares of grassland ecosystems remain worldwide (IUCN 2016). In Australia, grassland  
62 systems are the most poorly conserved and degraded communities (Hobbs & Yates, 2000), and are  
63 likely to experience major negative long-term effects. Many regions of Australia that support  
64 grasslands are becoming warmer, drier and increasingly fire prone under climate change, highlighting  
65 the importance of preserving genetic diversity and evolutionary potential (Dunlop *et al.*, 2012).  
66 However, most research on genetic diversity in grass species has generally been undertaken on those  
67 of agricultural importance (Buckler *et al.*, 2001) such as wheat, corn, rice, and sorghum, or those that  
68 are being developed for biofuels such as switchgrass (*Panicum* – Casler *et al.*, 2007; Harrison *et al.*,  
69 2015) and sugarcane (*Miscanthus* – Vermerris, 2008). While research on species such as switchgrass  
70 have provided valuable insights into natural patterns of genetic diversity, adaptation across gradients,  
71 and the role ploidy plays between these lines of enquiry (Morris *et al.*, 2011; Lowry *et al.*, 2014,  
72 2019; Grabowski *et al.*, 2014), major gaps in knowledge for other ecologically important grasses  
73 persist and continue to inhibit effective conservation management.

74

75 Genetic diversity is maintained within a species by a combination of selective (such as range shifts  
76 and natural selection) and neutral processes (such as gene flow, mutation, and genetic drift) (Futuyma,  
77 2013). However, grasses often have complex evolutionary histories (Stebbins, 1956) influenced by  
78 factors such as clonality (Fischer & Van Kleunen, 2002), polyploidy (Keeler & Bradshaw, 1998),  
79 intrageneric hybridization, genome size, and different physiologies such as photosynthetic  
80 mechanisms (e.g. C3 versus C4) (Edwards *et al.*, 2010). These complex and often lineage-specific life  
81 histories can complicate our ability to project findings across species, meaning that the species-  
82 specific data needed for practitioners to make informed management decisions is often lacking.  
83 Perhaps the lack of research on ecologically important grass species and their complex life histories  
84 are not mutually exclusive. Regardless, information about how genetic diversity is distributed across  
85 habitats and environmental gradients, often reflecting selection and local adaptation, can help inform  
86 management and restoration strategies (Hoffmann *et al.*, 2015). This is particularly pertinent given  
87 grassland communities are already showing signs of climate stress, and empirical data is urgently

88 needed to support adaptive management strategies that prepare grasslands for new climate challenges  
89 by maximising evolutionary potential. In addition, research that focuses on genetic diversity across  
90 species ranges can help identify populations vulnerable to climate stress, allowing practitioners to  
91 prioritise management that safeguards populations at risk. For example, genomic signals of selection  
92 can be used to predict climate-driven population declines (Bay *et al.*, 2018). Specifically, ‘genomic  
93 vulnerability’ of individual populations, defined as the mismatch between current and predicted future  
94 genomic variation inferring population susceptibility to the loss of genetic diversity and/or  
95 maladaptation, can help identify populations most at risk. As our ability to integrate geospatial and  
96 genomic resources continues to grow, so will the ability of researchers to identify genomic  
97 vulnerability in ecologically important species, providing practitioners with improved management  
98 frameworks for mitigating climate change effects on ecosystems by preserving patterns of endemism  
99 and maximising adaptive potential.

100

101 Grasses often display ploidy differences among populations across their natural range. Indeed,  
102 polyploidy is common among vascular plants with c. 35% of species characterised as having a recent  
103 history of polyploidy (Wood *et al.*, 2009). For many species, associations between ploidy and local  
104 environmental conditions reflect adaptation, a pattern which has been studied extensively in crop  
105 plants (Alix *et al.*, 2017). Further, it has recently been shown that niche differentiation occurs faster in  
106 polyploids than diploid relatives (Baniaga *et al.*, 2019). While the causes of polyploidy are poorly  
107 understood (Soltis *et al.*, 2010), whole genome duplication events have been shown to coincide with  
108 historical climate change events (Cai *et al.*, 2019), and patterns of allopolyploidy have been linked to  
109 changes in environment (Wagner *et al.*, 2019). The effects of polyploidy are increasingly evident,  
110 with gene expression levels shown to vary from tissue to tissue in polyploids compared to their  
111 diploid counterparts (Adams *et al.*, 2003), and polyploid species often having significant fitness  
112 advantages (Petit & Thompson, 1997; Bretagnolle & Thompson, 2001; Ramsey, 2011; Hahn *et al.*,  
113 2012; Hoffmann *et al.*, 2015; Wei *et al.*, 2019). Genome duplication may in itself be an advantage  
114 because it buffers the organism against deleterious alleles (Voigt-Zielinski *et al.*, 2012; Wagner *et al.*,  
115 2019), and higher rates of heterozygosity reduce risks associated with inbreeding effects (Ronfort,  
116 1999). Despite the potential benefits of polyploidy, there are known disadvantages, including the  
117 potential dilution of beneficial mutations (Stebbins, 1971) and disturbance of cellular functions such  
118 as epigenetic regulation, mitosis, and meiosis (Comai, 2005). However, ploidy polymorphism may  
119 provide an important evolutionary pathway for species to establish in previously unsuitable habitats or  
120 adapt *in situ* (Grabowski *et al.*, 2014).

121

122 Understanding patterns of genetic diversity and evolutionary mechanisms for adapting to new  
123 environments is key to improving the conservation of intact grasslands and the restoration of degraded  
124 grassland habitats. Globally, restoration practices largely advocate the use of seed sourced from local  
125 provenances, based on the assumption that local genotypes are best matched to stable local

126 environments and to avoid perceived risks associated with outbreeding (Thornhill, 1993; Edmands,  
127 2006). Yet, in many cases local provenancing can lead to poor restoration outcomes (Broadhurst *et*  
128 *al.*, 2008; Prober *et al.*, 2015). In highly modified landscapes the genetic integrity of many species has  
129 been compromised, and local-provenancing can favour the selection of genetically depauperate and  
130 maladapted seed (Jones, 2013). Also, local-provenancing gives little consideration to the persistence  
131 of plantings under future climates, with growing evidence that genotypes from non-local sources may  
132 outperform those sourced locally (Hoffmann *et al.*, 2015; Prober *et al.*, 2015; Breed *et al.*, 2019). In  
133 addition, foundation species are especially important during the restoration process because their  
134 genetic variation can shape the networks of ecological interaction influencing community assembly,  
135 stability, and evolution (Gibson *et al.*, 2012; Lau *et al.*, 2016). Empirically derived restoration  
136 strategies are now being widely adopted around the world to support biodiversity, evolutionary  
137 potential, and restoration success, and similar approaches should also be employed for ploidy  
138 polymorphism.

139

140 In this study, we assess patterns of genetic structure, genotype-ploidy-environment associations, and  
141 genomic vulnerability in a foundational grassland species. *Themeda triandra*, commonly known as  
142 Kangaroo Grass, has a continent wide distribution, is characterised by ploidy polymorphisms  
143 (Hayman 1960) and has limited seed dispersal (Everson *et al.* 2009). The species provides critical  
144 ecosystem services supporting grassland habitats throughout Australia, and is widely used in  
145 grassland restorations, but is suffering major declines, shows signs of climate stress, and is in need of  
146 improved restoration guidelines. Notably, several studies suggest that re-establishment of *T. triandra*  
147 is an important first step for the restoration of Australia's grasslands (Adair & McDougall 1987;  
148 McDonald 2000; Cole & Lunt, 2005), highlighting the importance of research geared toward  
149 assessing the resilience of remnant populations, and management approaches that incorporate  
150 evolutionary potential. In this context, we assess the likely drivers of genetic structure across a portion  
151 of *T. triandra*'s range, predicting both isolation-by-distance (IBD) and isolation-by-environment  
152 (IBE) to be key drivers due to the species' limited seed dispersal and broad climatic niche. Based on  
153 estimates of gene flow and correlative measures of local adaptation, we test for genomic mismatches  
154 between local gene pools and future climates to help identify populations likely to be most vulnerable  
155 to new climatic challenges. Lastly, we test for associations between polyploidy and harsh climate  
156 zones, to gain insights into the role of polyploidy in historical and future adaptive processes. These  
157 results will provide clear pathways on how to incorporate genomic, environmental, and ploidy  
158 information into improved guidance for adaptive management plans that aim to protect these  
159 dwindling grassland ecosystems.

160

## 161 **Materials and Methods**

### 162 Species and sampling

163 *Themeda triandra* is a perennial C4 tussock grass, with ploidy variability, and occurs across three  
164 continents (Australia, Asia, and Africa) (Dell'Acqua *et al.*, 2013; Snyman *et al.*, 2013; Linder *et al.*,  
165 2018). It is Australia's most widespread species, being adapted to habitats as diverse as the semi-arid  
166 interior and sub-alpine regions (Mitchell & Miller, 1990). In Australia, diploids and tetraploids are the  
167 most common ploidy variants, but triploid, pentaploid, hexaploid and aneuploid individuals have also  
168 been identified (Hayman, 1960). Past studies suggest that *T. triandra* originally evolved in tropical  
169 Asia and migrated through coastal corridors to Australia (Hayman, 1960), with Australian lineages  
170 diverging 1.37 mya (0.79 - 3.07 mya) (Dunning *et al.*, 2017). However, dating using secondary  
171 calibrations, as in (Dunning *et al.*, 2017) can lead to unreliable and overly young estimates of  
172 divergence (Schenk, 2016). *Themeda triandra* is widely considered a foundation species for three  
173 reasons: 1) it defines particular ecosystems (Snyman *et al.*, 2013), 2) it controls the distribution and  
174 abundance of associated flora and fauna (Morgan, 1998), and 3) it regulates the core ecosystem  
175 processes especially through fire (Morgan & Lunt, 1999). The species is also considered to be an  
176 indicator of (agro)ecosystem health (Novellie & Kraaij, 2010) and its long-term persistence provides  
177 ecosystem stability, ecosystem services, resistance to plant invasions, and facilitates rehabilitation of  
178 polluted and degraded habitat (Novellie & Kraaij, 2010; Dell'Acqua *et al.*, 2013). Furthermore, its  
179 persistence is critical for the restoration of grasslands in Australia and is reliant on recurring fire to  
180 remove old tillers and for seedling establishment (McDougall 1989). The distribution of *T. triandra* is  
181 suggestive of a complex evolutionary history with high levels of genetic structuring throughout  
182 Australia. Although *T. triandra* itself is not formally listed as an endangered species, it is an important  
183 constituent of temperate grassland communities, which have been declared as endangered in the  
184 Australian Capital Territory and New South Wales, and threatened in Victoria. The grasslands are  
185 under threat due to loss and fragmentation of habitats through inadequate land management practices.  
186

187 Samples were collected between 2015 and 2017 from 52 populations spanning the heterogeneous  
188 climate from its eastern Australian distribution, which deliberately coincides with the densest portion  
189 of its distribution. Sampling was structured to ensure different environment combinations were  
190 sampled between coastal and inland (west of the Great Dividing Range, see Fig S1) sites. Sites were  
191 identified using records on the Atlas of Living Australia public database (ala.org.au) and chosen using  
192 the following criteria: herbaria collection or observation was after the year 2000, location data was  
193 within 50 m of accuracy, and occurred on land that was publicly accessible. Between 10 and 21 leaf  
194 samples were collected per location and placed directly into silica gel to rapidly dessicate leaf samples  
195 for DNA preservation. Sampled plants were at least 5 m apart to ensure independence of genotypes by  
196 minimising the chance of collecting clonal samples. Our collections comprised a total of 584  
197 individual specimens, which were stored under laboratory conditions until required for genetic  
198 analysis.  
199

200 Using the work of Hayman (1960), we created a predictive map of ploidy levels for populations  
201 distributed across our sampling distribution. Hayman measured ploidy levels across Australia, with  
202 most of his sites overlapping our sampling distribution. We interpolated his data using nearest  
203 neighbor analysis using QGIS v2.14 (Quantum GIS Development team), allowing us to extract  
204 predicted ploidy level for each population location to provide us with the number of predicted  
205 chromosomes (i.e. diploid = 20; tetraploid = 40; hexaploid = 60). A few individuals were equidistant  
206 between two predicted ploidy levels and were assigned ploidy level between 20 and 40. This was  
207 interpreted as indicating a mixed ploidy population. Ploidy predictions were verified with population-  
208 level heterozygosity, see below for details.

209

#### 210 DNA extraction and library preparation

211 For reduced-representation library preparation and sequencing, genomic DNA from each individual  
212 was isolated from approximately 25 mg of silica-dried leaf tissue using the Stratec Invisorb DNA  
213 Plant HTS 96 kit (Invitex, Berlin, Germany). Libraries were created similarly to Ahrens et al. (2017).  
214 Briefly, extracted DNA was digested with PstI for genome complexity reduction, and ligated with a  
215 uniquely barcoded sequencing adapter pair. We then amplified each sample individually by PCR to  
216 avoid sample bias. We pooled samples in equimolar ratios and selected amplicons between 350 and  
217 600 bp from an agarose gel. The library pool was sequenced on three Illumina NextSeq400 lanes  
218 using a 75bp paired-end protocol on a high output flowcell at the Biomolecular Resources Facility at  
219 the Australian National University, generating ~864 million read pairs.

220

221 For long-reads via the MinION sequencer (Oxford Nanopore Technologies, UK), we used the open  
222 access high molecular weight DNA extraction protocol developed by Jones & Borevitz (2019).  
223 Briefly, 30 g of fresh leaf material from a known diploid individual was processed with 150 mL  
224 nuclei isolation buffer using a high-powered blender. The homogenate was filtered repeatedly using a  
225 funnel, through sequentially 2, 4 and 8 layers of Miracloth. Next, 100% Triton X-100 was added for  
226 nuclei isolation and the mixture centrifuged to create a pellet of nuclei. The pellet was washed twice  
227 with a pre-chilled nuclei buffer. DNA extraction from the nuclei was initiated by adding fresh lysis  
228 buffer with 3% Sodium dodecyl sulfate (SDS) at 50°C. Binding buffer was added to use Sera-Mag  
229 beads to remove the lysis buffer from the DNA solution, washing with 70% ethanol 3 times until the  
230 beads were clean. The beads were removed by adding 220 uL of ultra-pure H<sub>2</sub>O and resuspending the  
231 beads with attached DNA. The supernatant was removed and subsequently size selected for fragments  
232 longer than 30 kb using a PippinHT (Sage Science, Beverly MA). MinION library preparation and  
233 sequencing was performed as per the manufacturer's instructions and specifications, and resulted in  
234 412,906 reads (Fig S2). Median read length was 27,156 bases, and the longest read length was  
235 144,466 bases, with an overall average read-quality of 10 (Fig S2).

236

#### 237 SNP calling

238 We checked the quality of the raw short-read sequencing reads with FastQC (v0.10.1, [Andrews,  
239 2012]). Then, we demultiplexed the raw reads associated with each sample's unique combinatorial  
240 barcode using AXE v0.2.6 (Murray & Borevitz, 2018). During this step we were unable to assign  
241 19% of the reads. We trimmed each sequence to 64 basepairs while removing the barcodes and  
242 ensured quality of the reads using trimmomatic v 0.38 (Bolger *et al.*, 2014). Quality was assessed  
243 using a sliding window of 4 basepairs (the number of bases used to average quality) and a quality  
244 score of 15 (the average quality required among the sliding window), and if the average quality  
245 dropped below 15, the sequences were cut. Then we indexed the long-reads (Fig S2 for distribution of  
246 length and number of reads sequenced) using the BWA software and the *index* argument. We aligned  
247 the short-reads to the long-reads for more accurate SNP calling compared to a *de novo* pipeline. Short-  
248 reads were aligned using BWA-mem (v0.7.17-r1198, [Li *et al.*, 2013]), as paired reads, with 82.5% of  
249 reads successfully mapped. Samtools v 1.9 (Li *et al.*, 2009) was used to transform the SAM files to  
250 BAM files for use within STACKS v 2.41 (Catchen *et al.*, 2013). The argument *gstacks* and  
251 *populations* were used in that order on the BAM files to create a VCF file, minimum thresholds  
252 (minor allele frequency = 0.01; one random SNP per read was retained) were set here for further  
253 cleaning in R (R core development team 2019). The mean coverage per sample was 15.8× with a  
254 standard deviation of 20×, this resulted in many samples being dropped (see below for details). Lastly,  
255 VCFtools v 0.1.16 (Danecek *et al.*, 2011) was used to create a 012 file for further cleaning of the snp  
256 matrix in R.

257

258 The missing data threshold was set to 50% per locus and individual which resulted in an average of  
259 30% missing data from the whole SNP dataframe. Minor allele frequency was set to 0.05 to avoid  
260 identifying patterns of population structure that may be due to locally shared alleles (De la Cruz &  
261 Raska, 2014). Then we removed SNPs in high linkage disequilibrium (>50% similar). We also  
262 removed possible clones in Genodive v 2.0b27 (Meirmans & Van Tienderen, 2004) using the *assign*  
263 *clones* function, removing nine individuals. After conservative SNP filtering, we were left with 487  
264 individuals from 52 populations.

265

## 266 Analysis

267 Genodive was used to estimate population summary statistics for the total number of alleles observed  
268 across loci, total heterozygosity, and the inbreeding coefficient ( $G_{IS}$ ; Nei, 1987). We expected that the  
269 degree of heterozygosity within populations would reflect ploidy status (i.e. higher heterozygosity  
270 would imply polyploids) as described by Soltis & Soltis (2000). Consequently, we validated predicted  
271 ploidy level among populations from Hayman's map (see above for details) by comparing those  
272 predictions to population-level heterozygosity.  $G_{IS}$  is the same as  $F_{IS}$  for a single locus with two  
273 alleles (Chakraborty & Leimar 1987), and is calculated by the ratio of observed heterozygosity within  
274 subpopulations to the expected heterozygosity and ranges from -1 (complete outbreeding) to 1  
275 (complete inbreeding). Genodive was also used for an analysis of molecular variance (AMOVA)



276 using the Excoffier method (Excoffier et al. 1995). Global  $F_{ST}$  with 95% confidence intervals was  
277 calculated using the *fstat* argument and the population pairwise  $F_{ST}$  was calculated using the  
278 *pairwise.fst* argument in the *hierfstat* package in R (Goudet, 2005).

279

280 *Themeda triandra* has a broad geographic distribution spanning a variety of environmental gradients,  
281 therefore we wanted to estimate the amount of genetic variation that could be attributed to isolation-  
282 by-distance (IBD) and -environment (IBE). First, we downloaded the 19 bioclim variables from  
283 worldclim.org (Fick & Hijmans, 2017), and extracted all of the climate variables for each of the  
284 sample locations in R using the package *raster* (Hijmans & van Etten 2012). A Principle Components  
285 Analysis (PCA) was performed to determine potential correlations between the 19 climate variables  
286 and produce an environmental dataset consisting of least correlated variables (Fig S3). We chose to  
287 retain variables from six of the loose clusters (temperature mean diurnal range ( $T_{RANGE}$ ), maximum  
288 temperature of the warmest month ( $T_{MAX}$ ), precipitation seasonality ( $P_{SEAS}$ ), mean annual temperature  
289 ( $T_{MA}$ ), mean annual precipitation ( $P_{MA}$ ), and precipitation of the driest month ( $P_{DM}$ )).

290

291 We used sNMF (Frichot *et al.*, 2014) in the LEA package in R (Frichot & François, 2015) to  
292 investigate the observed patterns of population structure that include contributions from both  
293 geography (IBD) and environment (IBE). sNMF estimates ancestry coefficients based on sparse non-  
294 negative matrix factorisation and least-squares optimisation. The sparse non-negative matrix  
295 factorisation is robust to departures from traditional population genetic model assumptions, making  
296 this algorithm ideal to use with polyploid species such as *T. triandra*. We performed sNMF with the  
297 following attributes:  $k = 1-10$ , 10 replications per  $k$ -value (number of ancestral clusters), and 1,000  
298 iterations. Entropy scores for each  $k$ -value were compared to choose the optimal number of clusters  
299 using the recommendations in the sNMF instruction manual. A consensus for the optimal  $k$ -value was  
300 created by averaging the results over the 10 replicate runs using CLUMPP v1.1.2 (Jakobsson &  
301 Rosenberg, 2007) and drawn using DISTRUCT v1.1 (Rosenberg, 2003).

302

303 We used Moran's Eigenvector Maps (MEM) to test if IBD was a major determinant of the species'  
304 genetic diversity, as described in previous work (Dray *et al.*, 2006; Legendre & Legendre, 2012) but  
305 called PCNM in the first papers. Briefly, MEM calculates a matrix of pairwise Euclidean distances **D**  
306 among the sampling sites, then transform the **D** matrix into a similarity matrix to produce the MEM.  
307 Eigenvalues are produced corresponding to orthogonal vectors of similarity. To ascertain spatial  
308 patterns of genetic diversity we used the R package memgene (Galpern *et al.*, 2014). Memgene  
309 identifies spatial neighbourhoods in genetic distance data that adopts a regression framework where  
310 the predictors are generated using MEMs, this multivariate technique was developed for spatial  
311 ecological analyses but is recommended for genetic applications. Memgene identifies variables  
312 (eigenvalues) that represent significant spatial genetic patterns at multiple spatial scales. Each variable

313 explains a proportion of the total variance explained by spatial patterns. For this study, we show two  
314 variables because it explains most of the variation described by IBD.

315

316 Using the environmental data layers we employ a generalized dissimilarity model (GDM) to identify  
317 the importance of specific climate variables responsible for shaping observed patterns of genetic  
318 structure within our dataset. Analyses were performed using the *gdm* package v 1.3.7 in R (Manion *et*  
319 *al.*, 2018) and a pairwise  $F_{ST}$  matrix (based on all SNP loci) to estimate allelic turnover through  
320 climatic space (deviations in allele frequency associated with environment type). Where GDM holds  
321 all variables in the model constant to identify the partial genomic distance associated with the climate  
322 factor (Ferrier *et al.*, 2007), whereby accounting for spatial patterns caused by demographic processes  
323 (Fitzpatrick & Keller, 2015). After running the GDM analysis, only four of the climates remained  
324 ( $T_{MAX}$ ,  $P_{SEAS}$ ,  $T_{MA}$ , and  $P_{MA}$ ), as the other two climate factors were removed by a  
325 backward elimination procedure. The GDM output includes the deviance explained by the climate  
326 and spatial variables, and a spline plot for each climate and spatial variable. Spline plots were  
327 predicted across the study area and beyond for every 2.5km grid cell. These predicted grids were  
328 mapped using *ggplot* in R (Wickham, 2011) to describe the relative IBE.

329

330 We calculated ‘genomic vulnerability’ for the sampling area following Bay *et al.* (2018), which  
331 consists of three main components: exposure, sensitivity, and adaptive capacity (Dawson *et al.*, 2011).  
332 Genomic vulnerability is the amount of genomic change required to track environmental change over  
333 time and is interpreted as expected population decline. To do this, we substituted predictive maps in  
334 2070 using the CCSM4 model with the representative concentration pathway 8.5 ([worldclim.org](http://worldclim.org)),  
335 which is a prediction based on the anthropogenic carbon dioxide output not deviating from its current  
336 trajectory. These maps were also downloaded from [worldclim](http://worldclim.org) and developed in the same way as  
337 described above. Lastly, we subtracted the projected genomic differentiation from the current  
338 genomic differentiation to get a difference between the two. We estimate genomic vulnerability twice,  
339 with and without predicted ploidy levels to understand how ploidy may affect population decline,  
340 particularly in the most vulnerable areas.

341

## 342 Results

343 We estimated patterns of population structure among 487 samples from 52 sample locations for *T.*  
344 *triandra* using a dataset consisting of 3,443 polymorphic SNPs with a minor allele frequency (MAF)  
345 of 0.05 and an average of 30% missing data. AMOVA indicated that a significant proportion of the  
346 genetic variance (10%) could be attributed to difference among sample sites ( $P = 0.001$ ;  $F_{ST} = 0.22$ ),  
347 while the majority of the variance (79.3%) was attributed to differences between individuals ( $P <$   
348  $0.01$ ;  $F_{IT} = 0.31$ ). Large and significant positive inbreeding coefficients ( $G_{IS}$ ) were observed for many  
349 sites, indicating an excess of homozygotes, while three populations had negative inbreeding  
350 coefficients indicating homozygote deficits (Table 1). Levels of genetic diversity (number of alleles

351 and heterozygosity) was variable among populations, with a mean number of alleles of 1.082 (95%  
352 CI 1.078-1.086; range 1.109 - 1.366) and a mean heterozygosity within populations ( $H_S$ ) of 0.074  
353 (range 0.06 - 0.12; Table 1). Heterozygosity estimates reflect patterns that are consistent with the  
354 hypothesis that greater ploidy levels are present in the hotter regions of our sampling distribution (Fig  
355 1). However, this linear model, although significant ( $r^2 = 0.086$ ;  $P = 0.035$ ), explains only a small  
356 proportion of the variation. This pattern is likely driven by the three populations in the hottest region.  
357 Heterozygosity and predicted chromosome number were in agreement for these three populations, the  
358 populations with the highest  $T_{MAX}$  (QLD, PR, SWC). Some populations with high heterozygosity  
359 were predicted to be diploids (UL, GOR, NAM), but these populations were nearly equidistant to  
360 tetraploid and diploid populations and are likely tetraploid populations (Fig 1).

361  
362 General patterns of population structure show a clear delineation between southern and northern  
363 populations (Fig 2) with an optimal  $k$ -value of 3 (Fig S4). The third  $k$ -value is found in two  
364 populations, and partially assigned in two other populations. These populations containing the third  
365 ancestral cluster were generally found in the central area of the sampling region. Notably, there are  
366 portions of populations, particularly in the south central portion of the sampling region, that have been  
367 assigned to the northern ancestral cluster. While there are a few individuals in the north assigned to  
368 the southern ancestral cluster.

369  
370 Isolation-by-distance (IBD) was found to be significant in *T. triandra*. In fact, IBD accounts for 54%  
371 of the total genomic variation (Fig 3). Two axes are shown in separate figures, and together they  
372 explained 95% of the variation explained by IBD alone. The first axis shows a strong split between  
373 the northern and southern sections of the sampling area (Fig 3a), similar to the population structure  
374 identified in the sNMF results. A second pattern of IBD occurs in the northern part of the sampling  
375 region and is between the inland and coastal populations, while the most westerly population is  
376 slightly more similar to the northern sampling region (Fig 3b).

377  
378 In addition to spatially driven genomic variation, isolation-by-environment (IBE) explains a  
379 significant amount of variation. While we chose six independent climate variables to explore IBE,  
380 only four were found to be significant ( $T_{MA}$ ,  $T_{MAX}$ ,  $P_{MA}$ ,  $P_{SEAS}$ ; maps for climate variables in Fig S5).  
381 The GDM analysis was able to identify that 31.3% of the variation was attributable to these climate  
382 and spatial variables (Fig 4), and 22.0% of the variation was attributable directly to climate. When  
383 performing the same analysis with the inclusion of ploidy level, the variation explained rose by only  
384 0.4%, but under this model, the  $T_{MAX}$  variable explained less variation (red lines in Fig 4) while all  
385 other variables remained similar. In the current climate, the differences between the two models were  
386 negligible (Fig 5a & c). However, when forecasting the differences in 2070, the outputs suggest a  
387 heterogeneous population decline by 0 and 25% (Fig 5b) with the highest proportion of change  
388 occurring inland of the eastern coast. Critically, the inclusion of ploidy polymorphism showed

389 genomic vulnerability dropping by 5% in the most vulnerable areas (Fig 5b & d; ploidy map provided  
390 in Fig S5), in this output, we find that genomic vulnerability occurs where the land transitions from  
391 the alpine region to the inland region. The lowest probability of change (population decline or gene  
392 pool turnover) is in the mountainous ecosystems in the southeastern portion of the sampling region.  
393

## 394 Discussion

395 Our study indicates contemporary structuring of genomic diversity in *Themeda triandra* is being  
396 driven largely by a combination of spatial and climate factors. These patterns are indicative of a  
397 species with limited propagule dispersal and restricted gene flow. The apparent lack of connectivity  
398 among remnant populations suggests gene flow is unlikely to help local populations adapt to future  
399 climate challenges. Instead, their adaptive potential will rely on trait plasticity and standing genetic  
400 variation that allows for adaptation *in situ*. Strong associations between gene pools and climate may  
401 reflect patterns of local adaptation, and heterogeneity in climatic conditions at both local and regional  
402 scales, suggests that the impacts of climate change on remnant populations are likely to be uneven.  
403 This is supported by assessments of mismatches between current and predicted future genomic  
404 variation, creating heterogeneous patterns of ‘genomic vulnerability’ across populations. We also  
405 demonstrate polyploidy associations with harsh climate zones, suggesting polyploidy is potentially  
406 linked to historical adaptation processes and may assist populations in overcoming future climate  
407 challenges. This study highlights the need for adaptive management strategies that incorporate  
408 evolutionary potential, including seed sourcing and population mixing strategies that can help  
409 overcome genomic vulnerability and maladaptation under future climates.

410

### 411 Isolation-by-distance

412 The majority of genomic variation found in *T. triandra* could be explained by geographic isolation.  
413 This is likely to be due to low levels of gene flow and seed dispersal between populations contributing  
414 to strong genetic structuring, as found in South African populations (Everson *et al.*, 2009). However,  
415 this structure could also be driven by a partially apomictic reproductive system in *T. triandra* (Brown  
416 & Emery, 1957; Birari, 1980), with clonal reproduction inflating signals of population-level genetic  
417 uniqueness. We found some evidence of clonal *T. triandra* genotypes, but these individuals were  
418 removed during the data filtering phase prior to analyses. While our data are unable to confirm the  
419 relationship between clonality and polyploidy due to low replication, our data suggests that  
420 polyploidy occurs infrequently at milder temperatures, while being dominant among populations  
421 occurring in the highest temperature environments. These findings are consistent with Hayman (1960)  
422 who argues that the diploid landrace is likely absent in the harsher climates, suggesting the presence  
423 of positive selection for polyploid landraces in the hot and dry inland environments.

424

425 Perhaps the most germane work of this nature is that of the grass species *Panicum virgatum*. Similar  
426 to *T. triandra*, *P. virgatum*’s ploidy level increases with distance from the coast, with higher ploidy

427 levels found in more arid inland environments (Zhang *et al.*, 2011; Lowry *et al.*, 2014; Grabowski *et al.*, 2014). As demonstrated in *P. virgatum*, we provide evidence for polyploidy evolution through  
428 multiple, isolated events rather than the establishment and expansion of polyploids from one  
429 duplication event. For example, some populations of predicted polyploids are more closely related to  
430 diploid populations rather than other tetraploid populations. This suggests genome doubling can occur  
431 spontaneously within populations and is both induced and maintained by selection under certain  
432 environmental scenarios. Indeed, it has been shown that polyploids can have an increased fitness  
433 advantage under heat- and water- stressed conditions (Rey *et al.*, 2017).

434

#### 436 Isolation-by-environment and genomic vulnerability

437 Along with geography, climate factors describe a large percentage of genomic variation found in *T.*  
438 *triandra*. We found strong associations between gene pools and environments (particularly with  $T_{MAX}$   
439 and  $P_{SEAS}$ ), possibly reflecting adaptation to climate. While quantitative tests are needed to validate  
440 these findings (e.g. common garden experiments – Sork, 2017), our results are consistent with the idea  
441 that signals of adaptation are ubiquitous throughout genomes (Kern & Hahn, 2018). Maximum  
442 temperature of the warmest month or week ( $T_{MAX}$ ) has been found to be an important driving force of  
443 selection in other Australian plants (Steane *et al.*, 2017a,b; Jordan *et al.*, 2017; Ahrens *et al.*, 2019).  
444 Interestingly, evidence suggests that climatic factors can have different impacts on patterns of genetic  
445 diversity and adaptation in different grass species. For example, *T. triandra* and *Andropogon gerardii*  
446 are both dominant C4 grass species, with temperature and precipitation factors being key selective  
447 forces driving diversity in *T. triandra*, while lower precipitation suppresses genetic diversity in *A.*  
448 *gerardii* (Avolio *et al.*, 2013). Despite these differences, polyploidy appears dominant in harsher  
449 regions in both species indicating there are ploidy based adaptive responses to climate, enabling the  
450 expansion of species into habitats unsuitable or less suitable for diploids. The line of adaptation  
451 demarcation is stronger for *T. triandra*, where persistence in the semi-arid landscape appears entirely  
452 dependent on polyploids, compared to *A. gerardii*, where ploidy mixing occurs in harsher parts of its  
453 climate range (Keeler, 1990).

454

455 Our analyses of genomic vulnerability across the study area suggest that some populations of *T.*  
456 *triandra* will be more adversely impacted by climate change than others. For example, the most inland  
457 populations of our sampling are most vulnerable where we estimate that populations will need to  
458 change by over 20%, this region includes both diploid and polyploid populations. The least vulnerable  
459 populations are located in the southern and mountainous regions where we would expect populations  
460 to change by 0 to 5%. The future mismatch of predicted gene pools in some regions suggests that a  
461 change of as much as 25% will be necessary for adaptation to the new challenges. Our predictions are  
462 based only on correlative analyses, and caution should be taken when interpreting these findings given  
463 the uncertainty associated with the genetic mechanisms (i.e. epistatic interactions (Juenger *et al.*,  
464 2005), pleiotropy (Solovieff *et al.*, 2013), chromosomal rearrangements (Juenger *et al.*, 2005;

465 Yeaman, 2013), and polyploidy (Van de Peer *et al.*, 2017)) and ecological interactions likely to dictate  
466 future adaptive responses (Fordyce, 2006). Indeed, our findings further highlight the need for  
467 quantitative experiments (i.e. common garden) to validate these findings by testing the physiological  
468 limits and safety margins of individual populations.

469

470 Not surprisingly, the genomic vulnerability of several populations was buffered by as much as 5% by  
471 the presence of polyploids, and this is likely to be an underestimation due to under-predicting which  
472 populations are polyploids. Polyploidy is known to provide fitness advantages in many plant species  
473 persisting in hot and arid environments, including *T. triandra* populations (Godfree *et al.* 2017). The  
474 increased heterozygosity associated with polyploidy may have the effect of slowing the loss of genetic  
475 variation and providing more variants for selection to act upon (Comai, 2005). Elevated fitness may  
476 also be influenced by duplicated genes and genomes, each set capable of independent selection and  
477 evolving new functions (Soltis & Soltis, 2000) by retaining multiple gene copies and acquiring a new  
478 function in one copy (Wendel, 2000). Further, increased performance could be due to differential  
479 levels of expression between ploidy landraces (e.g. Cromie *et al.*, 2017; Wang *et al.*, 2018; Liqin *et*  
480 *al.*, 2019), and be partially dependent on different epigenetic patterns (Nagymihály *et al.*, 2017).

481 However, quantitative measures are needed to determine how differential expression between diploid  
482 and tetraploid landraces may affect their ability to persist in their optimal climates. We argue that  
483 these types of processes are likely occurring in *T. triandra* landraces, allowing polyploids to persist  
484 and outperform their diploid counterparts in hotter and drier climates.

485

#### 486 Management and restoration implications

487 We are at a critical juncture in history where management and restoration of grassland ecosystems is  
488 necessary to preserve these ecosystems and their services. However, the interplay of habitat  
489 fragmentation and rapid climate change poses a significant challenge for the conservation and  
490 restoration of functionally important plant species. Prioritising investments requires an understanding  
491 of species biology and ecology to apply frameworks for identifying the species and populations most  
492 at risk. *Themeda triandra*, the most widely distributed species in Australia, is at a critical inflection  
493 point due to its use as a food crop (Pascoe, 2018), for native pasture (Fourie *et al.*, 1985), as a  
494 foundational species (Snyman *et al.*, 2013), for selective breeding (e.g. *Lolium/Festuca* – Yamada *et*  
495 *al.*, 2005), and in the restoration of degraded lands (Cole & Lunt, 2005; Snyman *et al.*, 2013). Our  
496 results provide a critical first step and baseline information to support these new interests, future  
497 studies and the development of empirically based management strategies that target grassland and  
498 open woodland ecosystems. In Australia, research efforts have mostly focused on *Eucalyptus* species,  
499 finding that eucalypt populations are often connected by high levels of gene flow and adapted to local  
500 climates (e.g. Steane *et al.*, 2015; Jordan *et al.*, 2017; Supple *et al.*, 2018; Ahrens *et al.*, 2019). In one  
501 of the first landscape-scale genomic studies in Australia for an understory species, we show that the  
502 iconic grass *T. triandra* has very different patterns of connectivity and adaptation compared with its

503 *Eucalyptus* counterparts. Limited dispersal potential and high levels of genetic structuring among  
504 remnant populations of *T. triandra* suggests that their adaptability is likely to depend largely on trait  
505 plasticity and standing genetic variation that allows for adaptation *in situ*. We provide evidence of  
506 genetic and ploidy variation correlated with climate, suggesting that standing genetic variation may be  
507 retained within some *T. triandra* populations enabling adaptation to warmer and drier environments  
508 emerging under climate change. Indeed, our findings suggest the impacts of climate change may be  
509 heterogeneous across the distribution of *T. triandra*. This emphasises the importance of accounting for  
510 intraspecific variation, including ploidy, when predicting species responses to new climate challenges.  
511 Variability in physiological response to thermal stresses between populations has been established for  
512 many plant species (Moran *et al.*, 2016), which may contribute to uneven population responses to  
513 thermal stress (Miller *et al.*, 2019). These findings have implications for predicting population  
514 responses to climate change, and highlight the importance of interventions (assisted migrations of pre-  
515 adapted genotypes) to enhance the resilience of populations showing signs of climate stress given the  
516 existence of relatively tolerant populations across the species range.

517

#### 518 Conclusion

519 Successful establishment of *T. triandra* on three continents from its Asian centre-of-origin is likely  
520 due to its ability to swiftly meet the challenges of new environmental conditions through mechanisms  
521 unique to the species. Genomic analysis of a species can elucidate broad patterns of structure and  
522 provide information about how those patterns are distributed across the landscape. While spatial  
523 structure was the major component of the species' standing genetic diversity, environmental  
524 heterogeneity was also a major component driving patterns of diversity, and patterns of neutral  
525 genetic diversity have been shown to be affected by natural selection (Phung *et al.*, 2016). Thus, these  
526 findings illustrate that the standing genetic variation can provide a basis for adaptation to changing  
527 climates and should be incorporated into restoration projects. We were also able to investigate long  
528 standing ploidy questions within a landscape genomics context. Notably, we were able to quantify  
529 how ploidy might buffer the species from the most severe climate effects in the future. We found that  
530 ploidy, along with standing genetic diversity, could be an important part of the puzzle that increases  
531 the probability of grassland ecosystem persistence during a period of dramatic change. Our data  
532 suggest that we risk underestimating the adaptive capacity of a species if we do not correct for ploidy  
533 polymorphisms and we propose that they should be an integral part of management strategies moving  
534 forward. Management of multi-ploidy foundational species should focus on a combination of  
535 attributes, including genetic variation, intraspecific ploidy polymorphisms, and trait characteristics to  
536 develop populations that are resilient to future climate scenarios ensuring ecosystem health, function,  
537 and long-term restoration success.

538

539

## 540 Data accessibility

541 Our data will be deposited on Dryad. Including the full SNP data set and population metadata.

542

## 543 Acknowledgements

544 We would like to thank Dr Ashley Jones for assistance in the lab for DNA prep for long-read  
545 sequences and Dr Robert Godfree for access to a known diploid individual for long-read sequencing.  
546 Royal Botanic Gardens Melbourne Friends supported this work through the Helen McLellan Research  
547 Grant. JOB and NCA were supported by ARC Centre of Excellence in Plant Energy Biology CE  
548 CE140100008.

549

## 550 Author Contribution

551 Design of the research was by CA and EJ; collection was performed by CA and EJ along with  
552 volunteers; lab work was performed by NA; data analysis was performed by CA; and writing the  
553 manuscript was performed by CA, EJ, and AM and all authors contributed to editing the manuscript.

554



## 555 References

- 556 **Adair R, McDougall K. 1987.** *Re-establishment of Native Grasses in Lowland Areas Progress*  
557 *Report*. Australian National Parks and Wildlife Service, Canberra.
- 558 **Adams KL, Cronn R, Percifield R, Wendel JF. 2003.** Genes duplicated by polyploidy show  
559 unequal contributions to the transcriptome and organ-specific reciprocal silencing. *Proceedings of the*  
560 *National Academy of Sciences of the United States of America* **100**: 4649–4654.
- 561 **Ahrens CW, Supple MA, Aitken NC, Cantrill DJ, Borevitz JO, James EA. 2017.** Genomic  
562 diversity guides conservation strategies among rare terrestrial orchid species when taxonomy remains  
563 uncertain. *Annals of botany* **119**, 1267-1277.
- 564 **Ahrens CW, Byrne M, Rymer PD. 2019.** Standing genomic variation within coding and regulatory  
565 regions contributes to the adaptive capacity to climate in a foundation tree species. *Molecular Ecology*  
566 **28**: 2502–2516.
- 567 **Alix K, Gérard PR, Schwarzacher T, Heslop-Harrison JSP. 2017.** Polyploidy and interspecific  
568 hybridization: partners for adaptation, speciation and evolution in plants. *Annals of Botany* **120**: 183–  
569 194.
- 570 **Andrews S. 2010.** FastQC: a quality control tool for high throughput sequence data.
- 571 **Avolio ML, Beaulieu JM, Smith MD. 2013.** Genetic diversity of a dominant C4 grass is altered with  
572 increased precipitation variability. *Oecologia* **171**: 571–581.
- 573 **Baniaga AE, Marx HE, Arrigo N, Barker MS. 2019.** Polyploid plants have faster rates of  
574 multivariate niche differentiation than their diploid relatives. *Ecology Letters*.
- 575 **Bay RA, Harrigan RJ, Le Underwood V, Lisle Gibbs H, Smith TB, Rugg K. 2018.** Genomic  
576 signals of selection predict climate-driven population declines in a migratory bird. *Science* **359**: 83–  
577 86.
- 578 **Birari SP. 1980.** Apomixis and sexuality in *Themeda* forssk. at different ploidy levels (Gramineae).  
579 *Genetica* **54**: 133–139.
- 580 **Bolger AM, Lohse M, Usadel B. 2014.** Trimmomatic: a flexible trimmer for Illumina sequence data.  
581 *Bioinformatics* **30**: 2114–2120.
- 582 **Breed MF, Harrison PA, Blyth C, Byrne M, Gaget V, Gellie NJC, Groom SVC, Hodgson R,**  
583 **Mills JG, Prowse TAA, et al. 2019.** The potential of genomics for restoring ecosystems and  
584 biodiversity. *Nature Reviews Genetics* **20**: 615–628.

- 585 **Bretagnolle F, Thompson JD. 2001.** Phenotypic plasticity in sympatric diploid and autotetraploid  
586 *Dactylis glomerata*. *International Journal of Plant Sciences* **162**: 309–316.
- 587 **Broadhurst LM, Lowe A, Coates DJ, Cunningham SA, McDonald M, Vesk PA, Yates C. 2008.**  
588 Seed supply for broadscale restoration: maximizing evolutionary potential. *Evolutionary Applications*  
589 **1**: 587–597.
- 590 **Brown WV, Emery WHP. 1957.** Apomixis in the Gramineae, Tribe Andropogoneae: *Themeda*  
591 *triandra* and *Bothriochloa ischaemum*. *Botanical Gazette* **118**: 246–253.
- 592 **Buckler ES 4th, Thornsberry JM, Kresovich S. 2001.** Molecular diversity, structure and  
593 domestication of grasses. *Genetical Research* **77**: 213–218.
- 594 **Cai L, Xi Z, Amorim AM, Sugumaran M, Rest JS, Liu L, Davis CC. 2019.** Widespread ancient  
595 whole-genome duplications in *Malpighiales* coincide with Eocene global climatic upheaval. *New*  
596 *Phytologist* **221**: 565–576.
- 597 **Casler MD, Stendal CA, Kapich L, Vogel KP. 2007.** Genetic diversity, plant adaptation regions,  
598 and gene pools for switchgrass. *Crop Science* **47**: 2261.
- 599 **Catchen J, Hohenlohe PA, Bassham S, Amores A, Cresko WA. 2013.** Stacks: an analysis tool set  
600 for population genomics. *Molecular Ecology* **22**: 3124–3140.
- 601 **Chakraborty R, Leimar O. 1987.** Genetic variation within a subdivided population. In *Population*  
602 *Genetics and Fishery Management*. (Eds N. Ryman and F. Utter.) pp. 89–120.
- 603 **Cole BI, Lunt ID. 2005.** Restoring Kangaroo Grass (*Themeda triandra*) to grassland and woodland  
604 understoreys: a review of establishment requirements and restoration exercises in south-east Australia.  
605 *Ecological Management and Restoration* **6**: 28–33.
- 606 **Comai L. 2005.** The advantages and disadvantages of being polyploid. *Nature Reviews Genetics* **6**:  
607 836–846.
- 608 **Cromie GA, Tan Z, Hays M, Jeffery EW, Dudley AM. 2017.** Dissecting gene expression changes  
609 accompanying a ploidy-based phenotypic switch. *G3* **7**: 233–246.
- 610 **Danecek P, Auton A, Abecasis G, Albers CA, Banks E, DePristo MA, Handsaker RE, Lunter G,  
611 Marth GT, Sherry ST, et al. 2011.** The variant call format and VCFtools. *Bioinformatics* **27**: 2156–  
612 2158.
- 613 **Dawson TP, Jackson ST, House JI, Prentice IC, Mace GM. 2011.** Beyond predictions: biodiversity  
614 conservation in a changing climate. *Science* **332**: 53–58.

- 615 **De la Cruz O, Raska P. 2014.** Population structure at different minor allele frequency levels. *BMC*  
616 *Proceedings* **8**: S55.
- 617 **Dell'Acqua M, Gomasasca S, Porro A, Bocchi S. 2013.** A tropical grass resource for pasture  
618 improvement and landscape management: *Themeda triandra* Forssk. *Grass and Forage Science* **68**:  
619 205–215.
- 620 **Dray S, Legendre P, Peres-Neto PR. 2006.** Spatial modelling: a comprehensive framework for  
621 principal coordinate analysis of neighbour matrices (PCNM). *Ecological Modelling* **196**: 483–493.
- 622 **Dunlop M, Hilbert D, Ferrier S, House A, Liedloff A, Prober SM, et al. 2012.** The implications of  
623 climate change for biodiversity conservation and the National Reserve System: Final synthesis.: A  
624 report prepared for the Department of Sustainability, Environment, Water, Population and  
625 Communities, and the Department of Climate Change and Energy Efficiency. CSIRO Climate  
626 Adaptation Flagship, Canberra, Australia.
- 627 **Dunning LT, Liabot A-L, Olofsson JK, Smith EK, Vorontsova MS, Besnard G, Simpson KJ,**  
628 **Lundgren MR, Addicott E, Gallagher RV, et al. 2017.** The recent and rapid spread of *Themeda*  
629 *triandra*. *Botany Letters* **164**: 327–337.
- 630 **Edmands S. 2006.** Between a rock and a hard place: evaluating the relative risks of inbreeding and  
631 outbreeding for conservation and management. *Molecular Ecology* **16**: 463–475.
- 632 **Edwards EJ, Osborne CP, Strömberg CAE, Smith SA, C4 Grasses Consortium, Bond WJ,**  
633 **Christin P-A, Cousins AB, Duvall MR, Fox DL, et al. 2010.** The origins of C4 grasslands:  
634 integrating evolutionary and ecosystem science. *Science* **328**: 587–591.
- 635 **Eldridge DJ, Poore AGB, Ruiz-Colmenero M, Letnic M, Soliveres S. 2016.** Ecosystem structure,  
636 function, and composition in rangelands are negatively affected by livestock grazing. *Ecological*  
637 *Applications* **26**: 1273–1283.
- 638 **Everson TM, Yeaton RI, Everson CS. 2009.** Seed dynamics of *Themeda triandra* in the montane  
639 grasslands of South Africa. *African Journal of Range & Forage Science* **26**: 19–26.
- 640 **Excoffier L. 1995.** AMOVA 1.55 (analysis of molecular variance). *University of Geneva, Geneva*.
- 641 **Ferrier S, Manion G, Elith J, Richardson K. 2007.** Using generalized dissimilarity modelling to  
642 analyse and predict patterns of beta diversity in regional biodiversity assessment. *Diversity and*  
643 *Distributions* **13**: 252–264.
- 644 **Fick SE, Hijmans RJ. 2017.** WorldClim 2: new 1-km spatial resolution climate surfaces for global  
645 land areas. *International Journal of Climatology* **37**: 4302–4315.

- 646 **Fischer M, Van Kleunen M. 2002.** On the evolution of clonal plant life histories. *Evolutionary*  
647 *Ecology* **15**: 565–582.
- 648 **Fitzpatrick MC, Keller SR. 2015.** Ecological genomics meets community-level modelling of  
649 biodiversity: mapping the genomic landscape of current and future environmental adaptation. *Ecology*  
650 *Letters* **18**: 1–16.
- 651 **Fordyce JA. 2006.** The evolutionary consequences of ecological interactions mediated through  
652 phenotypic plasticity. *Journal of Experimental Biology* **209**: 2377–2383.
- 653 **Fourie JH, Opperman DPJ, Roberts BR. 1985.** Evaluation of the grazing potential of grass species  
654 in Tarchonanthus veld of the northern cape. *Journal of the Grassland Society of Southern Africa* **2**:  
655 13–17.
- 656 **Frichot E, François O. 2015.** LEA: An R package for landscape and ecological association studies.  
657 *Methods in Ecology and Evolution* **6**: 925–929.
- 658 **Frichot E, Mathieu F, Trouillon T, Bouchard G, François O. 2014.** Fast and efficient estimation of  
659 individual ancestry coefficients. *Genetics* **196**: 973–983.
- 660 **Futuyma DJ. 2013.** *Evolution*. Sinauer Associates Incorporated. Sunderland, MA.
- 661 **Galpern P, Peres-Neto PR, Polfus J, Manseau M. 2014.** MEMGENE: Spatial pattern detection in  
662 genetic distance data. *Methods in Ecology and Evolution* **5**: 1116–1120.
- 663 **Gibson DJ, Allstadt AJ, Baer SG, Geisler M. 2012.** Effects of foundation species genotypic  
664 diversity on subordinate species richness in an assembling community. *Oikos* **121**: 496–507.
- 665 **Godfree RC, Marshall DJ, Young AG, Miller CH, Mathews S. 2017.** Empirical evidence of fixed  
666 and homeostatic patterns of polyploid advantage in a keystone grass exposed to drought and heat  
667 stress. *Royal Society Open Science* **4**: 170934.
- 668 **Goudet J. 2005.** hierfstat, a package for r to compute and test hierarchical *F*-statistics. *Molecular*  
669 *Ecology Notes* **5**: 184–186.
- 670 **Grabowski PP, Morris GP, Casler MD, Borevitz JO. 2014.** Population genomic variation reveals  
671 roles of history, adaptation and ploidy in switchgrass. *Molecular Ecology* **23**: 4059–4073.
- 672 **Hahn MA, van Kleunen M, Müller-Schärer H. 2012.** Increased phenotypic plasticity to climate  
673 may have boosted the invasion success of polyploid *Centaurea stoebe*. *PLoS ONE* **7**: e50284.
- 674 **Harrison SP, Gornish ES, Copeland S. 2015.** Climate-driven diversity loss in a grassland  
675 community. *Proceedings of the National Academy of Sciences of the United States of America* **112**:

- 676 8672–8677.
- 677 **Hayman DL. 1960.** The distribution and cytology of the chromosome races of *Themeda australis* in  
678 southern Australia. *Australian Journal of Botany* **8**: 58.
- 679 **Hijmans RJ, van Etten J. 2012.** raster: Geographic analysis and modeling with raster data. R  
680 package version 2.0-12. <http://CRAN.R-project.org/package=raster>
- 681 **Hobbs RJ, Yates CJ. 2000.** *Temperate Eucalypt Woodlands in Australia: Biology, Conservation,*  
682 *Management and Restoration.* Surrey Beatty & Sons Pty. Ltd. Chipping Norton, Australia
- 683 **Hoffmann A, Griffin P, Dillon S, Catullo R, Rane R, Byrne M, Jordan R, Oakeshott J, Weeks A,**  
684 **Joseph L, et al. 2015.** A framework for incorporating evolutionary genomics into biodiversity  
685 conservation and management. *Climate Change Responses* **2**: 1.
- 686 **Hopkins A, Holz B. 2006.** Grassland for agriculture and nature conservation: production, quality and  
687 multi-functionality. *Agronomy research* **4**, 3-20.
- 688 **IUCN. 2016.** <https://www.unep-wcmc.org/resources-and-data/protected-planet-report-2016> accessed:  
689 22 October 2019
- 690 **Jakobsson M, Rosenberg NA. 2007.** CLUMPP: a cluster matching and permutation program for  
691 dealing with label switching and multimodality in analysis of population structure. *Bioinformatics* **23**:  
692 1801–1806.
- 693 **Jones TA. 2013.** When local isn't best. *Evolutionary Applications* **6**: 1109-1118.
- 694 **Jones A, Borevitz JO. 2019.** Nuclear DNA purification from recalcitrant plant species for long-read  
695 sequencing <https://www.protocols.io/view/nuclear-dna-purification-from-recalcitrant-plant-s-vmee43e>  
696 accessed: 18 July 2019
- 697 **Jordan R, Hoffmann AA, Dillon SK, Prober SM. 2017.** Evidence of genomic adaptation to climate  
698 in *Eucalyptus microcarpa*: Implications for adaptive potential to projected climate change. *Molecular*  
699 *Ecology* **26**: 6002–6020.
- 700 **Juenger TE, Sen S, Stowe KA, Simms EL. 2005.** Epistasis and genotype-environment interaction  
701 for quantitative trait loci affecting flowering time in *Arabidopsis thaliana*. *Genetica* **123**: 87–105.
- 702 **Keeler KH. 1990.** Distribution of polyploid variation in big bluestem (*Andropogon gerardii*,  
703 Poaceae) across the tallgrass prairie region. *Genome* **33**: 95–100.
- 704 **Keeler KH, Bradshaw AD. 1998.** Population biology of intraspecific polyploidy in grasses. In  
705 *Population Biology of Grasses.* Cambridge University Press, Cambridge, UK. 183–206.

- 706 **Kern AD, Hahn MW. 2018.** The neutral theory in light of natural selection. *Molecular Biology and*  
707 *Evolution* **35**: 1366–1371.
- 708 **Lau MK, Keith AR, Borrett SR, Shuster SM, Whitham TG. 2016.** Genotypic variation in  
709 foundation species generates network structure that may drive community dynamics and evolution.  
710 *Ecology* **97**: 733–742.
- 711 **Legendre P, Legendre L. 2012.** Numerical Ecology. (3rd. English ed.), Elsevier. Amsterdam,  
712 Netherlands.
- 713 **Li H, Handsaker B, Wysoker A, Fennell T, Ruan J, Homer N, Marth G, Abecasis G, Durbin R,**  
714 **1000 Genome Project Data Processing Subgroup. 2009.** The sequence alignment/map format and  
715 SAMtools. *Bioinformatics* **25**: 2078–2079.
- 716 **Li H. 2013.** Aligning sequence reads, clone sequences and assembly contigs with BWA-MEM.  
717 arXiv:1303.3997
- 718 **Linder HP, Lehmann CER, Archibald S, Osborne CP, Richardson DM. 2018.** Global grass  
719 (Poaceae) success underpinned by traits facilitating colonization, persistence and habitat  
720 transformation. *Biological reviews of the Cambridge Philosophical Society* **93**: 1125–1144.
- 721 **Liqin G, Jianguo Z, Xiaoxia L, Guodong R. 2019.** Polyploidy-related differential gene expression  
722 between diploid and synthesized allotriploid and allotetraploid hybrids of *Populus*. *Molecular*  
723 *Breeding* **39**: 69.
- 724 **Lowry DB, Behrman KD, Grabowski P, Morris GP, Kiniry JR, Juenger TE. 2014.** Adaptations  
725 between ecotypes and along environmental gradients in *Panicum virgatum*. *The American Naturalist*  
726 **183**: 682–692.
- 727 **Lowry DB, Lovell JT, Zhang L, Bonnette J, Fay PA, Mitchell RB, Lloyd-Reilley J, Boe AR, Wu**  
728 **Y, Rouquette FM Jr, et al. 2019.** QTL × environment interactions underlie adaptive divergence in  
729 switchgrass across a large latitudinal gradient. *Proceedings of the National Academy of Sciences of*  
730 *the United States of America* **116**: 12933–12941.
- 731 **Manion G, Lisk M, Ferrier S, Nieto-Lugilde KM, Fitzpatrick MC. 2018.** gdm: Functions for  
732 generalized dissimilarity modeling. *R package*.
- 733 **McDonald T, 2000.** Strategies for the ecological restoration of woodland plant communities:  
734 harnessing natural resilience. In: *Temperate Eucalypt Woodlands in Australia: Biological*  
735 *Conservation, Management and Restoration* (eds Richard J. Hobbs and Colin J. Yates), pp. 286–297.  
736 Surrey Beatty and Sons, Chipping Norton, NSW.

- 737 **McDougall KL. 1989.** The re-establishment of *Themeda triandra* (kangaroo grass): implications for  
738 the restoration of grasslands [Victoria]. *Technical Report Series-Arthur Rylah Institute for*  
739 *Environmental Research (Australia).*
- 740 **Meirmans PG, Van Tienderen PH. 2004.** genotype and genodive: two programs for the analysis of  
741 genetic diversity of asexual organisms. *Molecular Ecology Notes* **4**: 792–794.
- 742 **Miller AD, Hoffmann AA, Tan MH, Young M, Ahrens C, Cocomazzo M, Rattray A,**  
743 **Ierodiaconou DA, Treml E, Sherman CDH. 2019.** Local and regional scale habitat heterogeneity  
744 contribute to genetic adaptation in a commercially important marine mollusc (*Haliotis rubra*) from  
745 southeastern Australia. *Molecular Ecology* **28**: 3053–3072.
- 746 **Mitchell M, Miller M. 1990.** The identification of some common native grasses in Victoria.  
747 *Rutherglen Research Institute, Victoria, Australia.*
- 748 **Moran EV, Hartig F, Bell DM. 2016.** Intraspecific trait variation across scales: implications for  
749 understanding global change responses. *Global Change Biology* **22**: 137–150.
- 750 **Morgan JW. 1998.** Importance of canopy gaps for recruitment of some forbs in *Themeda triandra*-  
751 dominated grasslands in south-eastern Australia. *Australian Journal of Botany* **46**: 609.
- 752 **Morgan JW, Lunt ID. 1999.** Effects of time-since-fire on the tussock dynamics of a dominant grass  
753 (*Themeda triandra*) in a temperate Australian grassland. *Biological Conservation* **88**: 379–386.
- 754 **Morris GP, Grabowski PP, Borevitz JO. 2011.** Genomic diversity in switchgrass (*Panicum*  
755 *virgatum*): from the continental scale to a dune landscape. *Molecular ecology* **20**: 4938–4952.
- 756 **Murray KD, Borevitz JO. 2018.** Axe: rapid, competitive sequence read demultiplexing using a trie.  
757 *Bioinformatics* **34**: 3924–3925.
- 758 **Nagymihály M, Veluchamy A, Györgypál Z, Ariel F, Jégu T, Benhamed M, Szűcs A, Kereszt A,**  
759 **Mergaert P, Kondorosi É. 2017.** Ploidy-dependent changes in the epigenome of symbiotic cells  
760 correlate with specific patterns of gene expression. *Proceedings of the National Academy of Sciences*  
761 *of the United States of America* **114**: 4543–4548.
- 762 **Nei M. 1987.** *Molecular Evolutionary Genetics.*
- 763 **Novellie P, Kraaij T. 2010.** Evaluation of *Themeda triandra* as an indicator for monitoring the  
764 effects of grazing and fire in the Bontebok National Park. *Koedoe* **52**.
- 765 **Pascoe B. 2018.** *Dark Emu: Aboriginal Australia and the Birth of Agriculture, New Edition.*  
766 Magabala Books.

- 767 **Petit C, Thompson JD. 1997.** Variation in phenotypic response to light availability between diploid  
768 and tetraploid populations of the perennial grass *Arrhenatherum elatius* from open and woodland  
769 sites. *Journal of Ecology* **85**: 657.
- 770 **Phung TN, Huber CD, Lohmueller KE. 2016.** Determining the Effect of Natural Selection on  
771 Linked Neutral Divergence across Species. *PLoS genetics* **12**: e1006199.
- 772 **Prober SM, Byrne M, McLean EH, Steane DA, Potts BM, Vaillancourt RE, Stock WD. 2015.**  
773 Climate-adjusted provenancing: a strategy for climate-resilient ecological restoration. *Frontiers in*  
774 *Ecology and Evolution* **3**.
- 775 **Ramsey J. 2011.** Polyploidy and ecological adaptation in wild yarrow. *Proceedings of the National*  
776 *Academy of Sciences of the United States of America* **108**: 7096–7101.
- 777 **Raven J, Thomas H. 2010.** Grasses. *Current Biology* **20**: R837–R839.
- 778 **Rey PJ, Manzaneda AJ, Alcántara JM. 2017.** The interplay between aridity and competition  
779 determines colonization ability, exclusion and ecological segregation in the heteroploid  
780 *Brachypodium distachyon* species complex. *New Phytologist* **215**: 85–96.
- 781 **Ronfort J. 1999.** The mutation load under tetrasomic inheritance and its consequences for the  
782 evolution of the selfing rate in autotetraploid species. *Genetical Research* **74**: 31–42.
- 783 **Rosenberg NA. 2003.** distruct: a program for the graphical display of population structure. *Molecular*  
784 *Ecology Notes* **4**: 137–138.
- 785 **Schenk JJ. 2016.** Consequences of Secondary Calibrations on Divergence Time Estimates. *PloS one*  
786 **11**: e0148228.
- 787 **Shantz HL. 1954.** The Place of Grasslands in the Earth's Cover. *Ecology* **35**: 143–145.
- 788 **Snyman HA, Ingram LJ, Kirkman KP. 2013.** *Themeda triandra*: a keystone grass species. *African*  
789 *Journal of Range & Forage Science* **30**: 99–125.
- 790 **Solovieff N, Cotsapas C, Lee PH, Purcell SM, Smoller JW. 2013.** Pleiotropy in complex traits:  
791 challenges and strategies. *Nature Reviews Genetics* **14**: 483–495.
- 792 **Soltis DE, Buggs RJA, Doyle JJ, Soltis PS. 2010.** What we still don't know about polyploidy.  
793 *TAXON* **59**: 1387–1403.
- 794 **Soltis PS, Soltis DE. 2000.** The role of genetic and genomic attributes in the success of polyploids.  
795 *Proceedings of the National Academy of Sciences of the United States of America* **97**: 7051–7057.



- 796 **Sork VL. 2017.** Genomic Studies of Local Adaptation in Natural Plant Populations. *Journal of*  
797 *Heredity* **109**: 3–15.
- 798 **Steane DA, Mclean EH, Potts BM, Prober SM, Stock WD, Stylianou VM, Vaillancourt RE,**  
799 **Byrne M. 2017a.** Evidence for adaptation and acclimation in a widespread eucalypt of semi-arid  
800 Australia. *Biological Journal of the Linnean Society* **121**: 484–500.
- 801 **Steane DA, Potts BM, McLean EH, Collins L, Holland BR, Prober SM, Stock WD, Vaillancourt**  
802 **RE, Byrne M. 2017b.** Genomic Scans across Three Eucalypts Suggest that Adaptation to Aridity is a  
803 Genome-Wide Phenomenon. *Genome Biology and Evolution* **9**: 253–265.
- 804 **Steane DA, Potts BM, McLean E, Collins L, Prober SM, Stock WD, Vaillancourt RE, Byrne M.**  
805 **2015.** Genome-wide scans reveal cryptic population structure in a dry-adapted eucalypt. *Tree*  
806 *Genetics & Genomes* **11**.
- 807 **Stebbins GL. 1971.** *Processes of organic evolution*. Prentice Hall.
- 808 **Stebbins GL. 1956.** Cytogenetics and evolution of the grass family. *American Journal of Botany* **43**:  
809 890–905.
- 810 **Supple MA, Bragg JG, Broadhurst LM, Nicotra AB, Byrne M, Andrew RL, Widdup A, Aitken**  
811 **NC, Borevitz JO. 2018.** Landscape genomic prediction for restoration of a *Eucalyptus* foundation  
812 species under climate change. *eLife* **7**: e31835.
- 813 **Thornhill NW. 1993.** *The Natural History of Inbreeding and Outbreeding: Theoretical and*  
814 *Empirical Perspectives*. University of Chicago Press. Chicago, IL.
- 815 **Van de Peer Y, Mizrahi E, Marchal K. 2017.** The evolutionary significance of polyploidy. *Nature*  
816 *Reviews Genetics* **18**: 411–424.
- 817 **Vermerris W. 2008.** Miscanthus: Genetic Resources and Breeding Potential to Enhance Bioenergy  
818 Production. *Genetic Improvement of Bioenergy Crops*: 295–308.
- 819 **Voigt-Zielinski M-L, Piwczyński M, Sharbel TF. 2012.** Differential effects of polyploidy and  
820 diploidy on fitness of apomictic *Boechera*. *Sexual plant reproduction* **25**: 97–109.
- 821 **Wagner F, Ott T, Zimmer C, Reichhart V, Vogt R, Oberprieler C. 2019.** At the crossroads  
822 towards polyploidy: genomic divergence and extent of homoploid hybridization are drivers for the  
823 formation of the ox-eye daisy polyploid complex (*Leucanthemum*, Compositae-Anthemideae). *New*  
824 *Phytologist* **223**: 2039–2053.
- 825 **Wang T, Huang D, Chen B, Mao N, Qiao Y, Ji M. 2018.** Differential expression of photosynthesis-

- 826 related genes in pentaploid interspecific hybrid and its decaploid of *Fragaria* spp. *Genes & genomics*  
827 **40**: 321–331.
- 828 **Wei N, Cronn R, Liston A, Ashman T-L. 2019.** Functional trait divergence and trait plasticity  
829 confer polyploid advantage in heterogeneous environments. *New Phytologist* **221**: 2286–2297.
- 830 **Wendel JF. 2000.** Genome evolution in polyploids. *Plant Molecular Evolution*: 225–249.
- 831 **Wickham H. 2011.** ggplot2. *Computational Statistics* **3**: 180–185.
- 832 **Wood TE, Takebayashi N, Barker MS, Mayrose I, Greenspoon PB, Rieseberg LH. 2009.** The  
833 frequency of polyploid speciation in vascular plants. *Proceedings of the National Academy of*  
834 *Sciences of the United States of America* **106**: 13875–13879.
- 835 **Yamada T, Forster JW, Humphreys MW, Takamizo T. 2005.** Genetics and molecular breeding in  
836 *Lolium/Festuca* grass species complex. *Grassland Science* **51**: 89–106.
- 837 **Yeaman S. 2013.** Genomic rearrangements and the evolution of clusters of locally adaptive loci.  
838 *Proceedings of the National Academy of Sciences of the United States of America* **110**: E1743–51.
- 839 **Zhang Y, Zalapa JE, Jakubowski AR, Price DL, Acharya A, Wei Y, Brummer EC, Kaeppler**  
840 **SM, Casler MD. 2011.** Post-glacial evolution of *Panicum virgatum*: centers of diversity and gene  
841 pools revealed by SSR markers and cpDNA sequences. *Genetica* **139**: 933–948.
- 842  
843

844

## 845 Figure Legends

846 **Figure 1.** Within population heterozygosity ( $H_s$ ) versus maximum temperature of the warmest month.  
847 Colors indicate diploid (blue), mixed populations (green; equidistant between tetraploid and diploid  
848 populations), and tetraploid (red) based on Hayman's (1960) work. Ellipsoid outlines populations that  
849 have high heterozygosity and may be tetraploids.

850

851 **Figure 2.** Sparse non-negative matrix factorization (sNMF) for all individuals, points on the map  
852 indicate population location, map colors represent  $T_{MAX}$  (maximum temperature of the warmest  
853 month). Barplot indicates identified genetic ancestral clusters for each individual (bar) with an  
854 optimal  $k$ -value of three. Inset shows the Australia-wide distribution of *T. triandra* as a heat map and  
855 location of the study area.

856

857 **Figure 3.** Identification of the spatial component of genetic variation using Moran's Eigenvector  
858 Maps. Two distinct spatial patterns accounted for most of the 54% of genetic variation explained  
859 through isolation by distance. The first MEM variable (a) explained a greater proportion of the  
860 variation than the second variable (b). Circles of similar size and colour represent individuals with  
861 similar scores on this axis.

862

863 **Figure 4.** Generalised dissimilarity modelling (GDM). (a) Non-linear relationship between climate  
864 distance and genomic distance, where points are site pairs. (b) Relationship between predicted  
865 genomic distance and observed genomic distance, where points are site pairs. (c) The geographic  
866 spline showing the relationship between predicted genomic change and geographic distance. (d–g)  
867 Predicted splines showing the estimated relationship between genomic distance and individual climate  
868 variables: (d) mean annual precipitation ( $T_{MA}$ ), (e) maximum temperature of the warmest month  
869 ( $T_{MAX}$ ), (f) mean annual precipitation ( $P_{MA}$ ), and (g) precipitation seasonality ( $P_{SEAS}$ ); inset is the  
870 amount of variation explained by predicted ploidy polymorphisms (red lines are the model that  
871 includes ploidy). Variation explained for the climate-only + spatial model is 31.3% (22% attributed to  
872 climate), and with climate, ploidy, and spatial is 31.7% (23% attributed to climate).

873

874 **Figure 5.** Predicted spatial variation in genomic composition based on the outputs from the general  
875 dissimilarity models (GDM). Maps include the (a) climate-only GDM and (b) the predicted genomic  
876 vulnerability based on comparing the current GDM and the predicted GDM for 2070. Whereas, the (c)  
877 climate + ploidy GDM, and (d) and the predicted genomic vulnerability are shown for direct  
878 comparison to the climate-only model. A 5% reduction in genomic vulnerability is indicated in the  
879 most severely affected areas when including ploidy level in the GDM. The greater the difference  
880 (dark orange), the more genomic change is needed to adjust to future climate conditions.

881

882

## 883 Tables

884 **Table 1.** Locations and genetic diversity indices for sampled populations.  $T_{MAX}$  = maximum  
 885 temperature of the warmest month;  $P_{SEAS}$  = precipitation seasonality;  $H_s$  = heterozygosity  
 886 within populations;  $G_{IS}$  = inbreeding coefficient;  $A_N$  = number of alleles;  $C_P$  = predicted  
 887 chromosome number.

| Pop     | X       | Y       | $T_{MAX}$ (°C) | $P_{SEAS}$ (mm) | $A_N$ | $H_s$ | $C_P$ | $G_{IS}$ |
|---------|---------|---------|----------------|-----------------|-------|-------|-------|----------|
| MTG     | 138.754 | -34.977 | 26.7           | 52              | 1.357 | 0.088 | 40    | 0.059    |
| BBNP    | 153.028 | -30.420 | 28.1           | 43              | 1.215 | 0.066 | 20    | 0.181    |
| BCR     | 153.054 | -28.646 | 28.2           | 45              | 1.241 | 0.071 | 20    | 0.182    |
| BL      | 151.737 | -29.867 | 25.6           | 33              | 1.233 | 0.068 | 20    | 0.2      |
| BLAPT   | 152.807 | -31.395 | 26.9           | 34              | 1.232 | 0.079 | 20    | 0.317    |
| BLARD   | 150.444 | -35.196 | 25.3           | 24              | 1.21  | 0.066 | 20    | 0.154    |
| BNR     | 151.997 | -29.113 | 25.2           | 32              | 1.169 | 0.064 | 20    | 0.156    |
| BRA     | 151.996 | -32.631 | 27.2           | 25              | 1.212 | 0.064 | 20    | 0.179    |
| BU      | 151.076 | -30.189 | 29.5           | 31              | 1.164 | 0.064 | 20    | 0.207    |
| BYR     | 153.620 | -28.652 | 28.1           | 32              | 1.203 | 0.064 | 20    | 0.143    |
| CB      | 150.674 | -30.885 | 30.9           | 34              | 1.164 | 0.062 | 30    | 0.137    |
| BCG     | 143.316 | -37.612 | 26.1           | 23              | 1.142 | 0.043 | 20    | 0.085    |
| DCD     | 150.728 | -34.013 | 28.1           | 29              | 1.294 | 0.083 | 40    | 0.121    |
| DCR     | 149.982 | -36.356 | 24.8           | 24              | 1.271 | 0.08  | 30    | 0.062    |
| DW      | 151.997 | -29.114 | 25.2           | 32              | 1.203 | 0.068 | 20    | 0.165    |
| RWCK    | 146.817 | -36.583 | 28.1           | 32              | 1.185 | 0.062 | 22    | 0.366    |
| BUR     | 145.026 | -37.834 | 26.0           | 17              | 1.136 | 0.06  | 20    | 0.328    |
| ANG     | 144.153 | -38.335 | 23.9           | 22              | 1.187 | 0.07  | 20    | 0.138    |
| EUN     | 152.888 | -30.811 | 27.7           | 39              | 1.234 | 0.067 | 20    | 0.184    |
| GHK     | 149.863 | -36.979 | 24.0           | 18              | 1.259 | 0.073 | 20    | 0.236    |
| GOR     | 150.588 | -35.009 | 25.2           | 23              | 1.397 | 0.102 | 20    | -0.04    |
| GRES    | 151.219 | -32.546 | 30.1           | 34              | 1.231 | 0.068 | 20    | 0.171    |
| QLD     | 149.878 | -27.926 | 33.5           | 29              | 1.309 | 0.12  | 40    | 0.034    |
| JG      | 152.008 | -30.514 | 25.3           | 38              | 1.187 | 0.065 | 20    | 0.196    |
| KCK     | 152.579 | -31.795 | 27.5           | 37              | 1.238 | 0.068 | 20    | 0.177    |
| KOZ     | 148.402 | -35.889 | 22.4           | 29              | 1.255 | 0.075 | 20    | 0.28     |
| KUN     | 152.844 | -31.196 | 27.3           | 37              | 1.20  | 0.069 | 20    | 0.205    |
| L       | 152.292 | -28.411 | 27.9           | 37              | 1.195 | 0.073 | 20    | 0.17     |
| LO      | 149.998 | -33.167 | 26.4           | 20              | 1.203 | 0.082 | 20    | 0.318    |
| MGR     | 149.077 | -36.244 | 25.0           | 19              | 1.254 | 0.07  | 20    | 0.051    |
| ML      | 152.473 | -28.380 | 26.9           | 40              | 1.285 | 0.083 | 20    | 0.218    |
| MNP     | 150.373 | -35.457 | 24.1           | 13              | 1.36  | 0.089 | 20    | 0.127    |
| Mong    | 149.944 | -35.426 | 25.5           | 16              | 1.193 | 0.064 | 20    | 0.252    |
| MS      | 150.881 | -29.988 | 29.8           | 31              | 1.161 | 0.067 | 40    | 0.165    |
| MSF     | 149.055 | -34.825 | 28.1           | 13              | 1.293 | 0.084 | 20    | 0.334    |
| NAB     | 152.370 | -32.086 | 27.7           | 35              | 1.217 | 0.063 | 20    | 0.226    |
| NAM     | 152.976 | -30.639 | 28.0           | 41              | 1.109 | 0.109 | 20    | ---      |
| OPC     | 153.037 | -29.820 | 28.5           | 40              | 1.109 | 0.064 | 20    | 0.116    |
| PR      | 150.186 | -31.418 | 31.7           | 34              | 1.366 | 0.115 | 40    | -0.135   |
| MSCP    | 140.631 | -37.145 | 28.1           | 44              | 1.242 | 0.072 | 20    | 0.257    |
| SIW     | 153.146 | -30.192 | 27.4           | 40              | 1.147 | 0.062 | 20    | 0.17     |
| SOM     | 151.286 | -33.404 | 26.1           | 31              | 1.248 | 0.065 | 20    | 0.187    |
| SPNR    | 149.747 | -37.557 | 22.6           | 12              | 1.247 | 0.07  | 20    | 0.157    |
| STCK    | 149.314 | -35.360 | 26.7           | 13              | 1.257 | 0.075 | 20    | 0.245    |
| SWC     | 149.707 | -31.400 | 31.3           | 31              | 1.18  | 0.105 | 41    | -0.753   |
| NSW     | 148.142 | -36.542 | 26.6           | 17              | 1.245 | 0.067 | 20    | 0.151    |
| TOO     | 152.391 | -28.453 | 28.7           | 39              | 1.221 | 0.068 | 20    | 0.183    |
| UL      | 152.073 | -30.537 | 25.2           | 39              | 1.234 | 0.099 | 20    | -0.326   |
| WOL     | 150.806 | -34.434 | 25.6           | 31              | 1.229 | 0.065 | 20    | 0.183    |
| WYE     | 151.491 | -33.175 | 26.6           | 30              | 1.235 | 0.065 | 20    | 0.195    |
| YNGNP   | 150.693 | -33.057 | 28.2           | 38              | 1.223 | 0.063 | 26    | 0.196    |
| YNR     | 151.076 | -30.189 | 29.5           | 31              | 1.213 | 0.076 | 20    | 0.319    |
| Overall |         |         |                |                 | 1.842 | 0.074 |       | 0.134    |

888

889

## 890 Supplementary information

891 **Table S1.**  $F_{ST}$  pairwise table and input for GDM analysis. (tsv file)

892 **Figure S1.** Elevation of the study area.

893 **Figure S2.** Histogram of MinION long-read read-lengths and average read quality.

894 **Figure S3.** Principal components analysis for all 19 bioclim variables.

895 **Figure S4.** Cross entropy plot to determine the  $k$ -value for sNMF results.

896 **Figure S5.** Maps for all four climate variables and ploidy distribution.

897

898

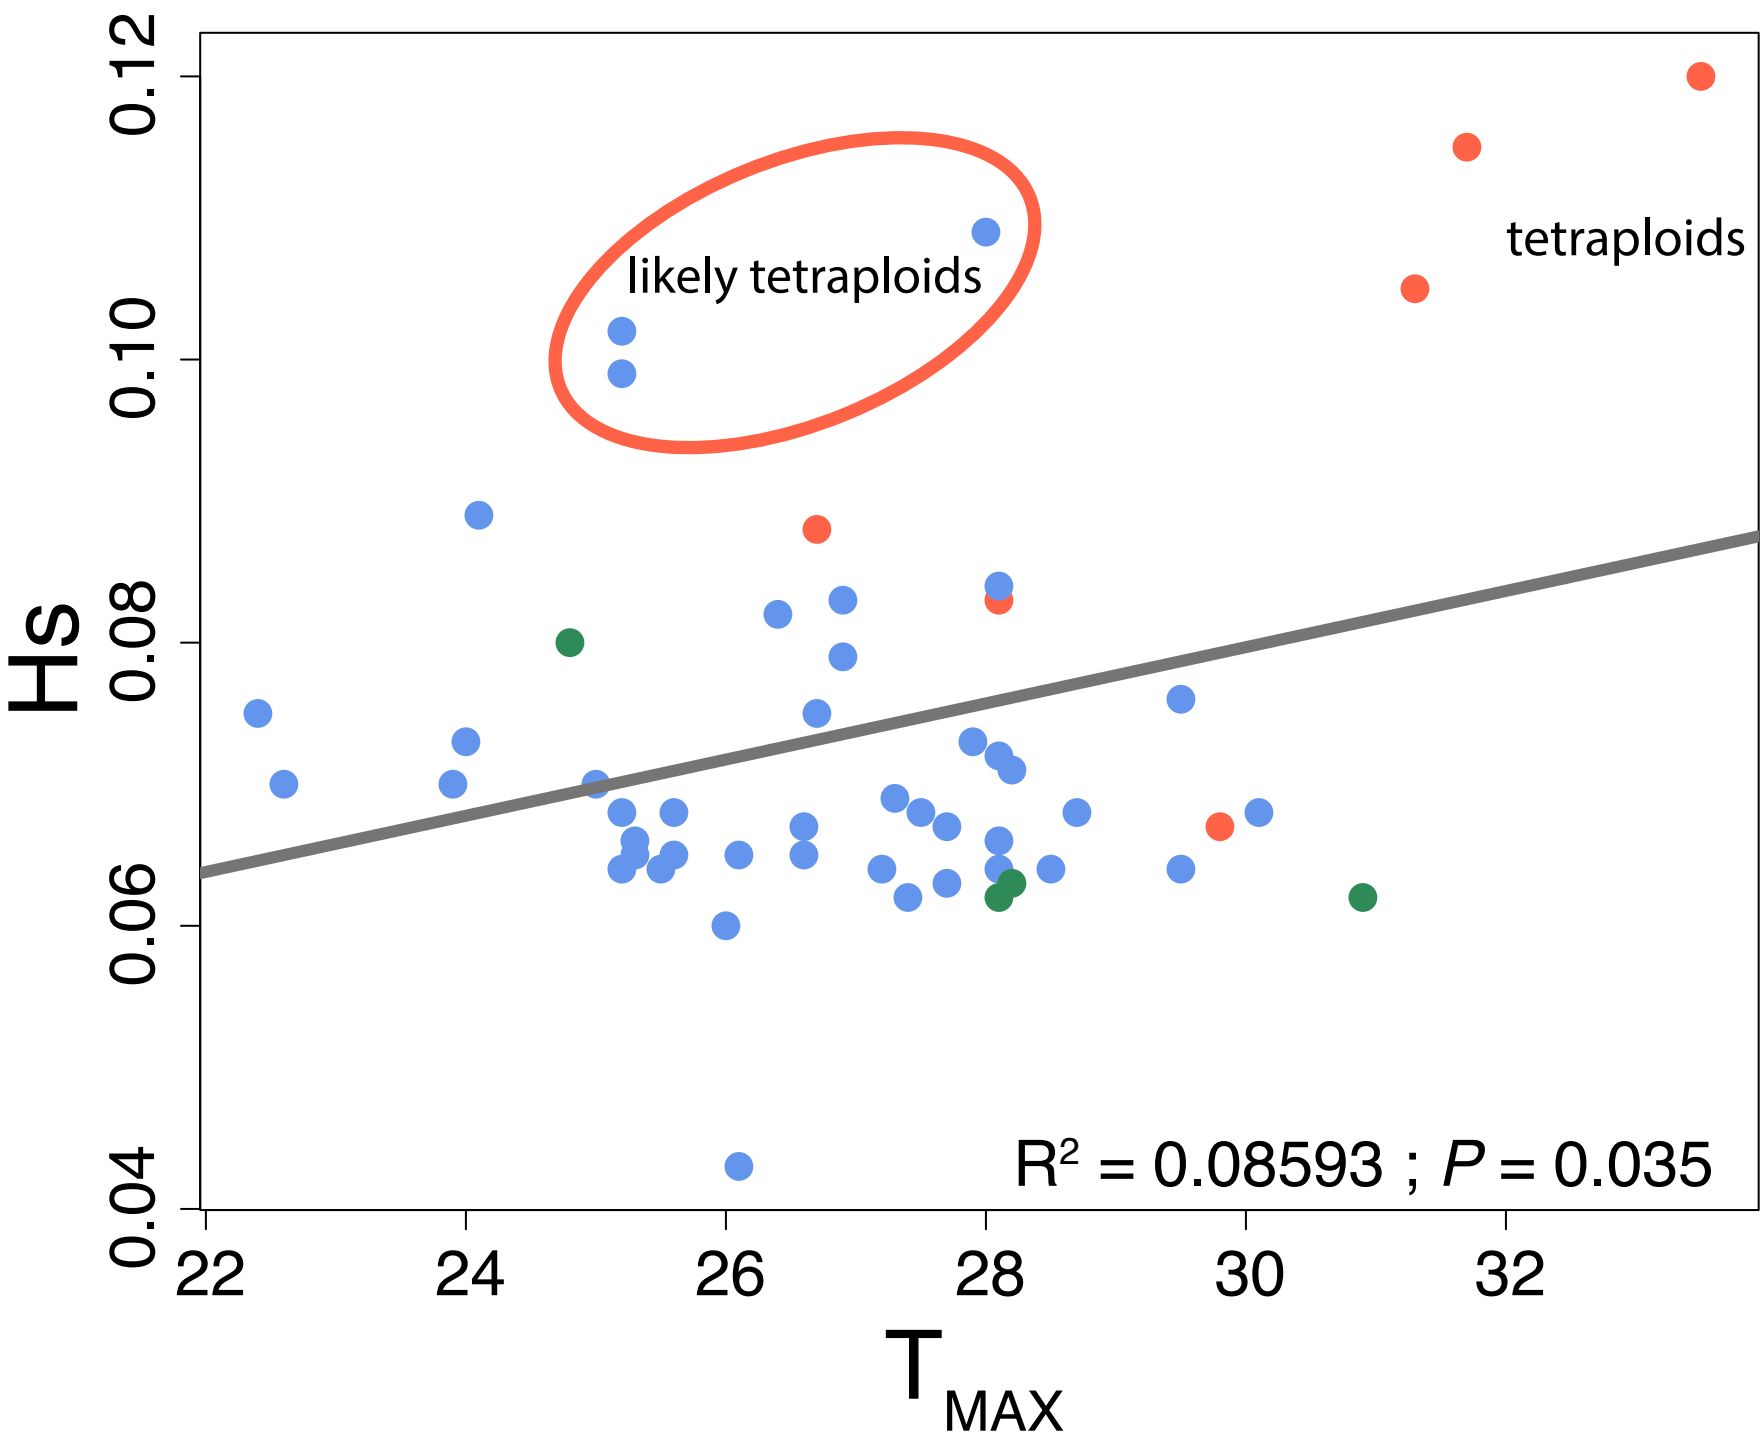

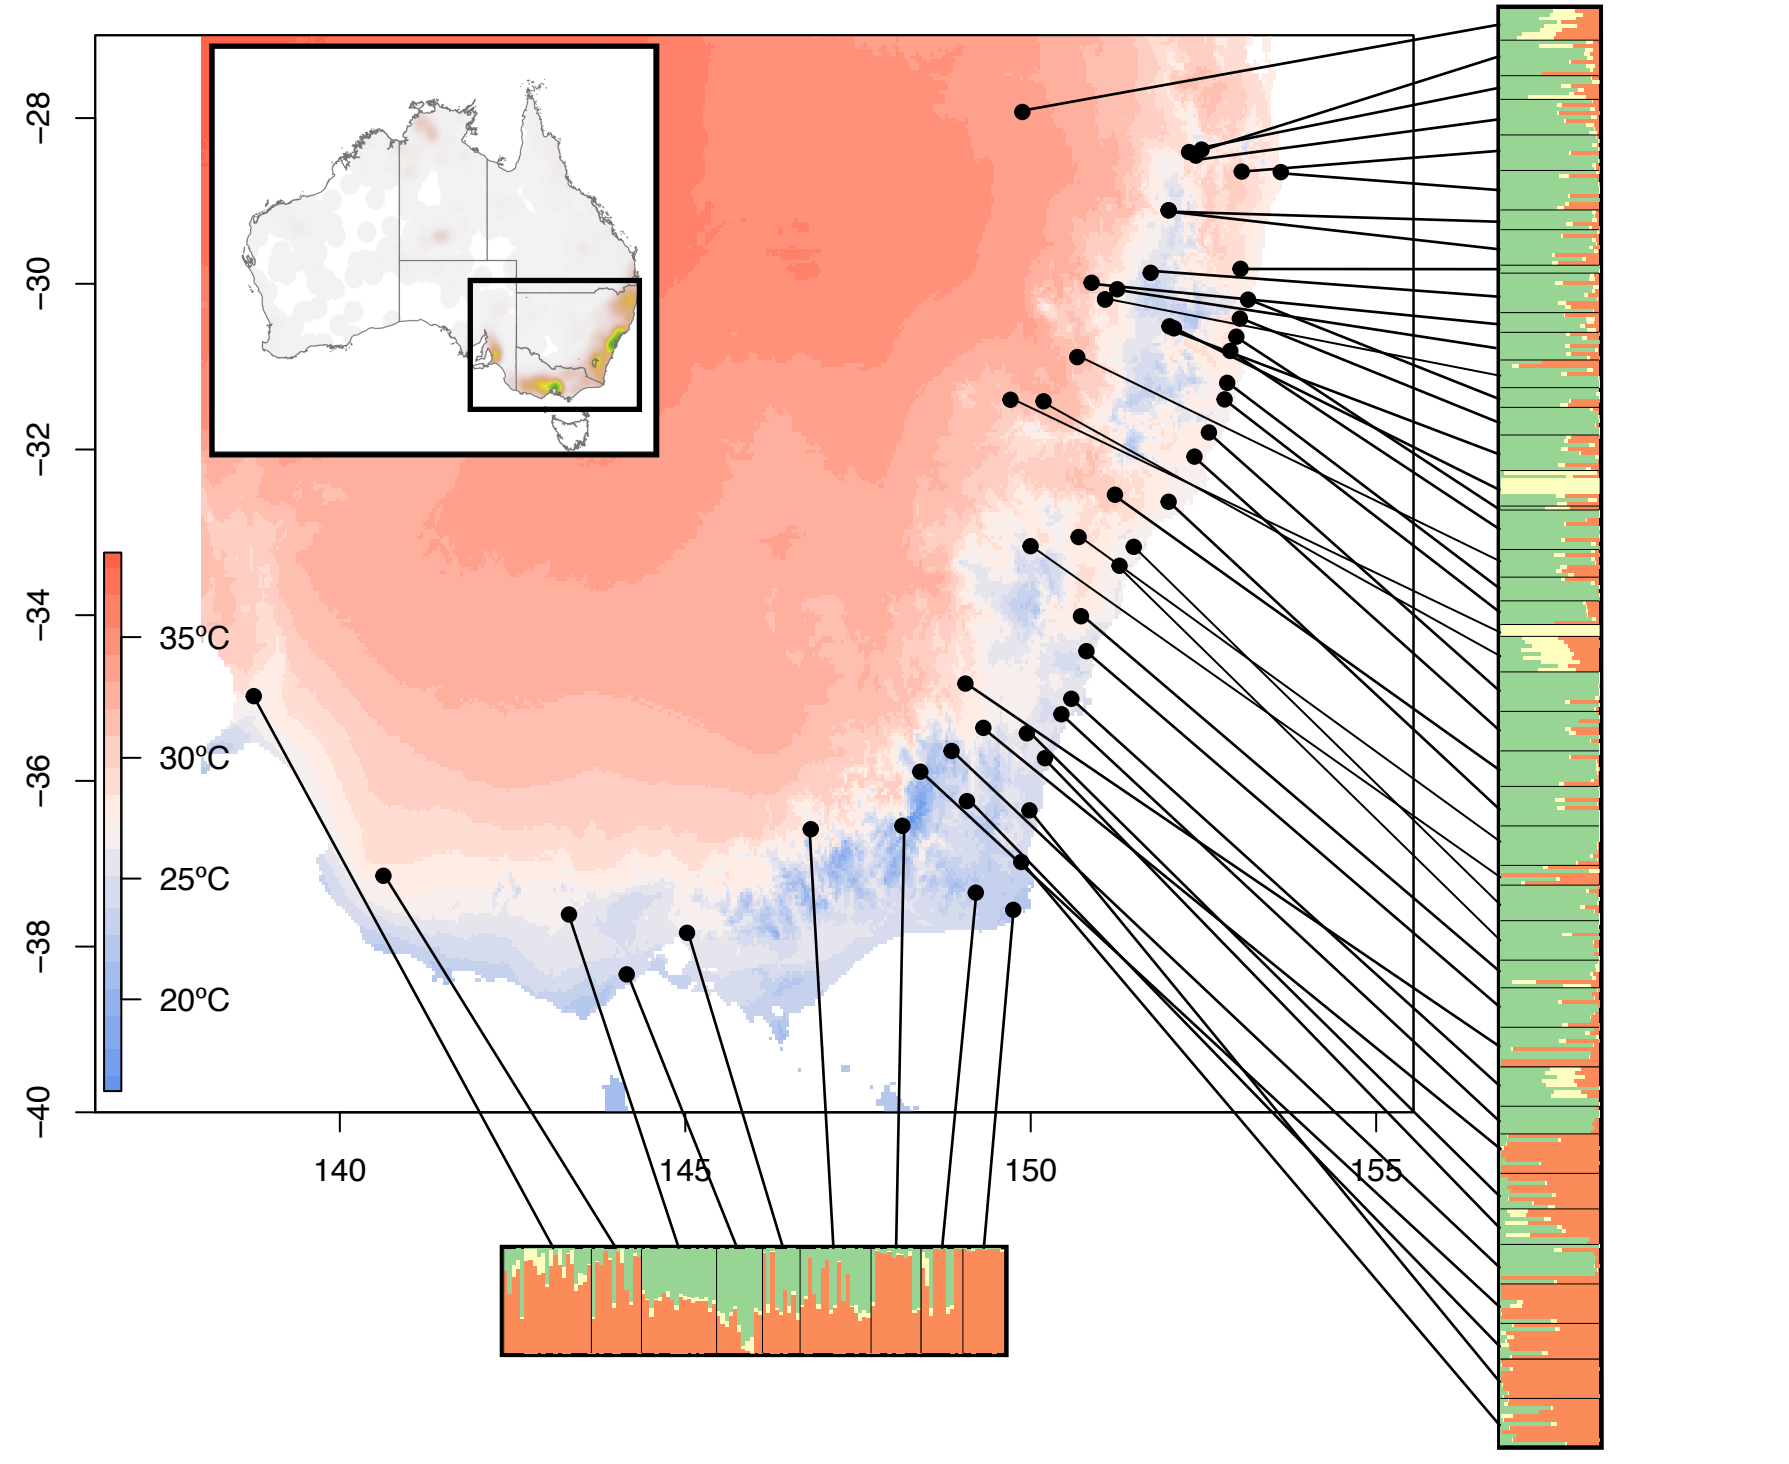

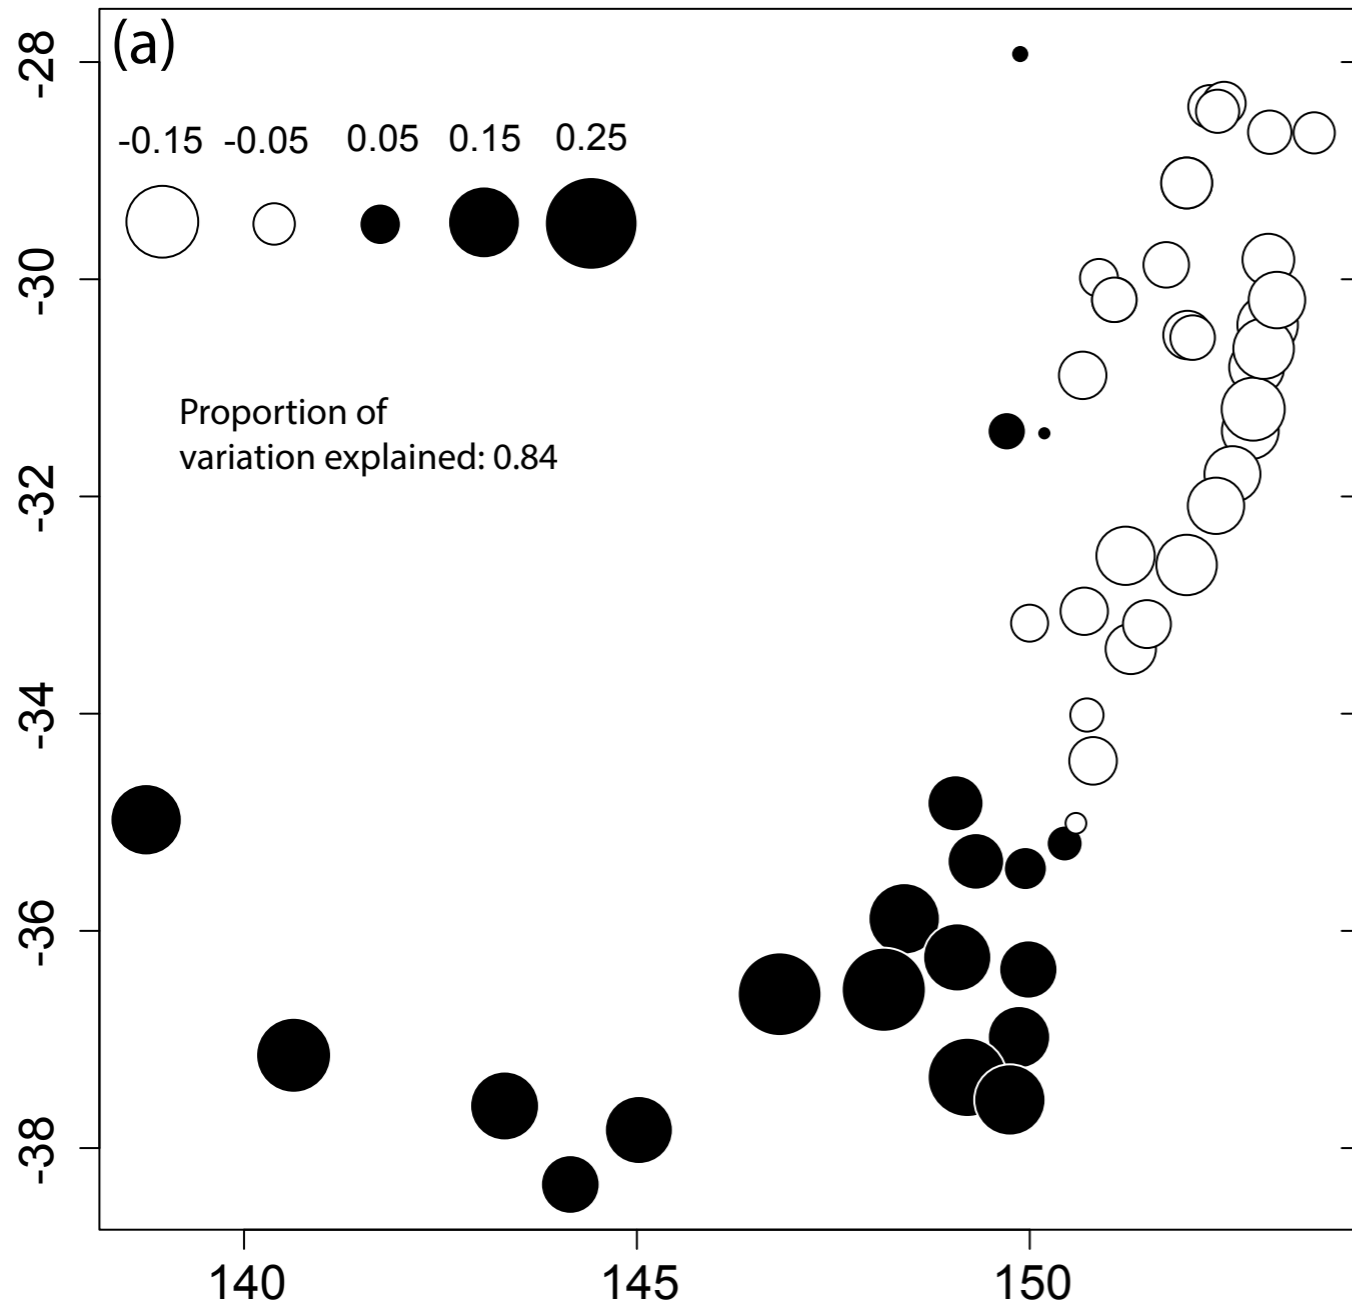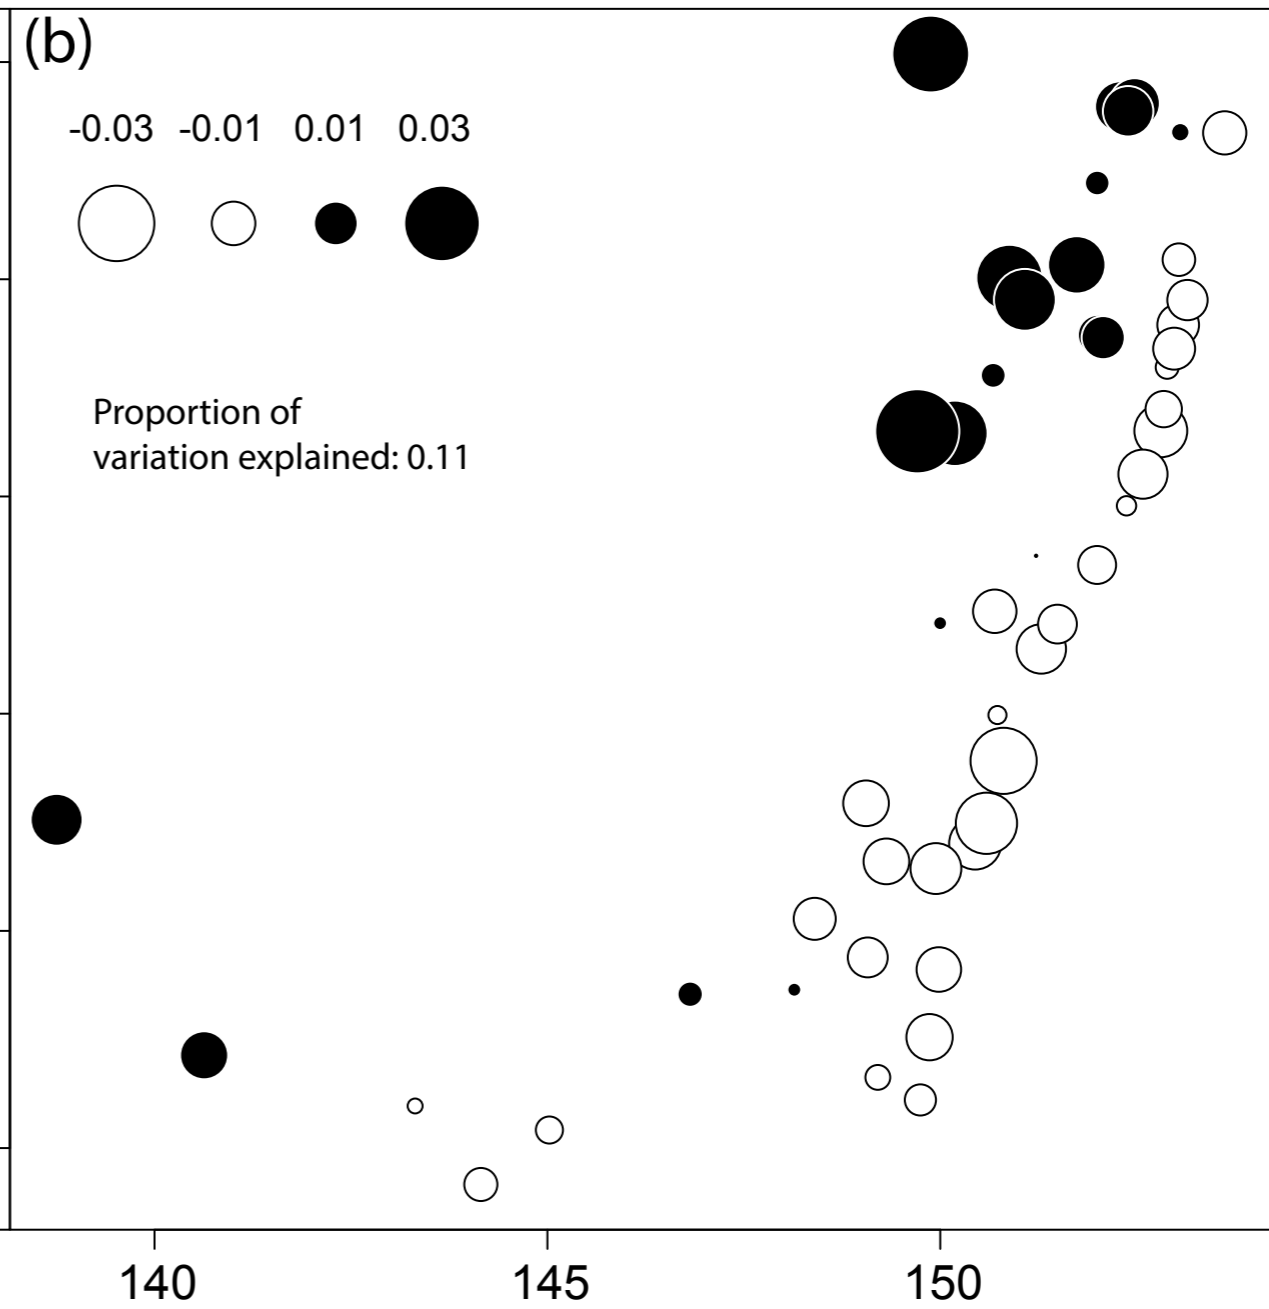



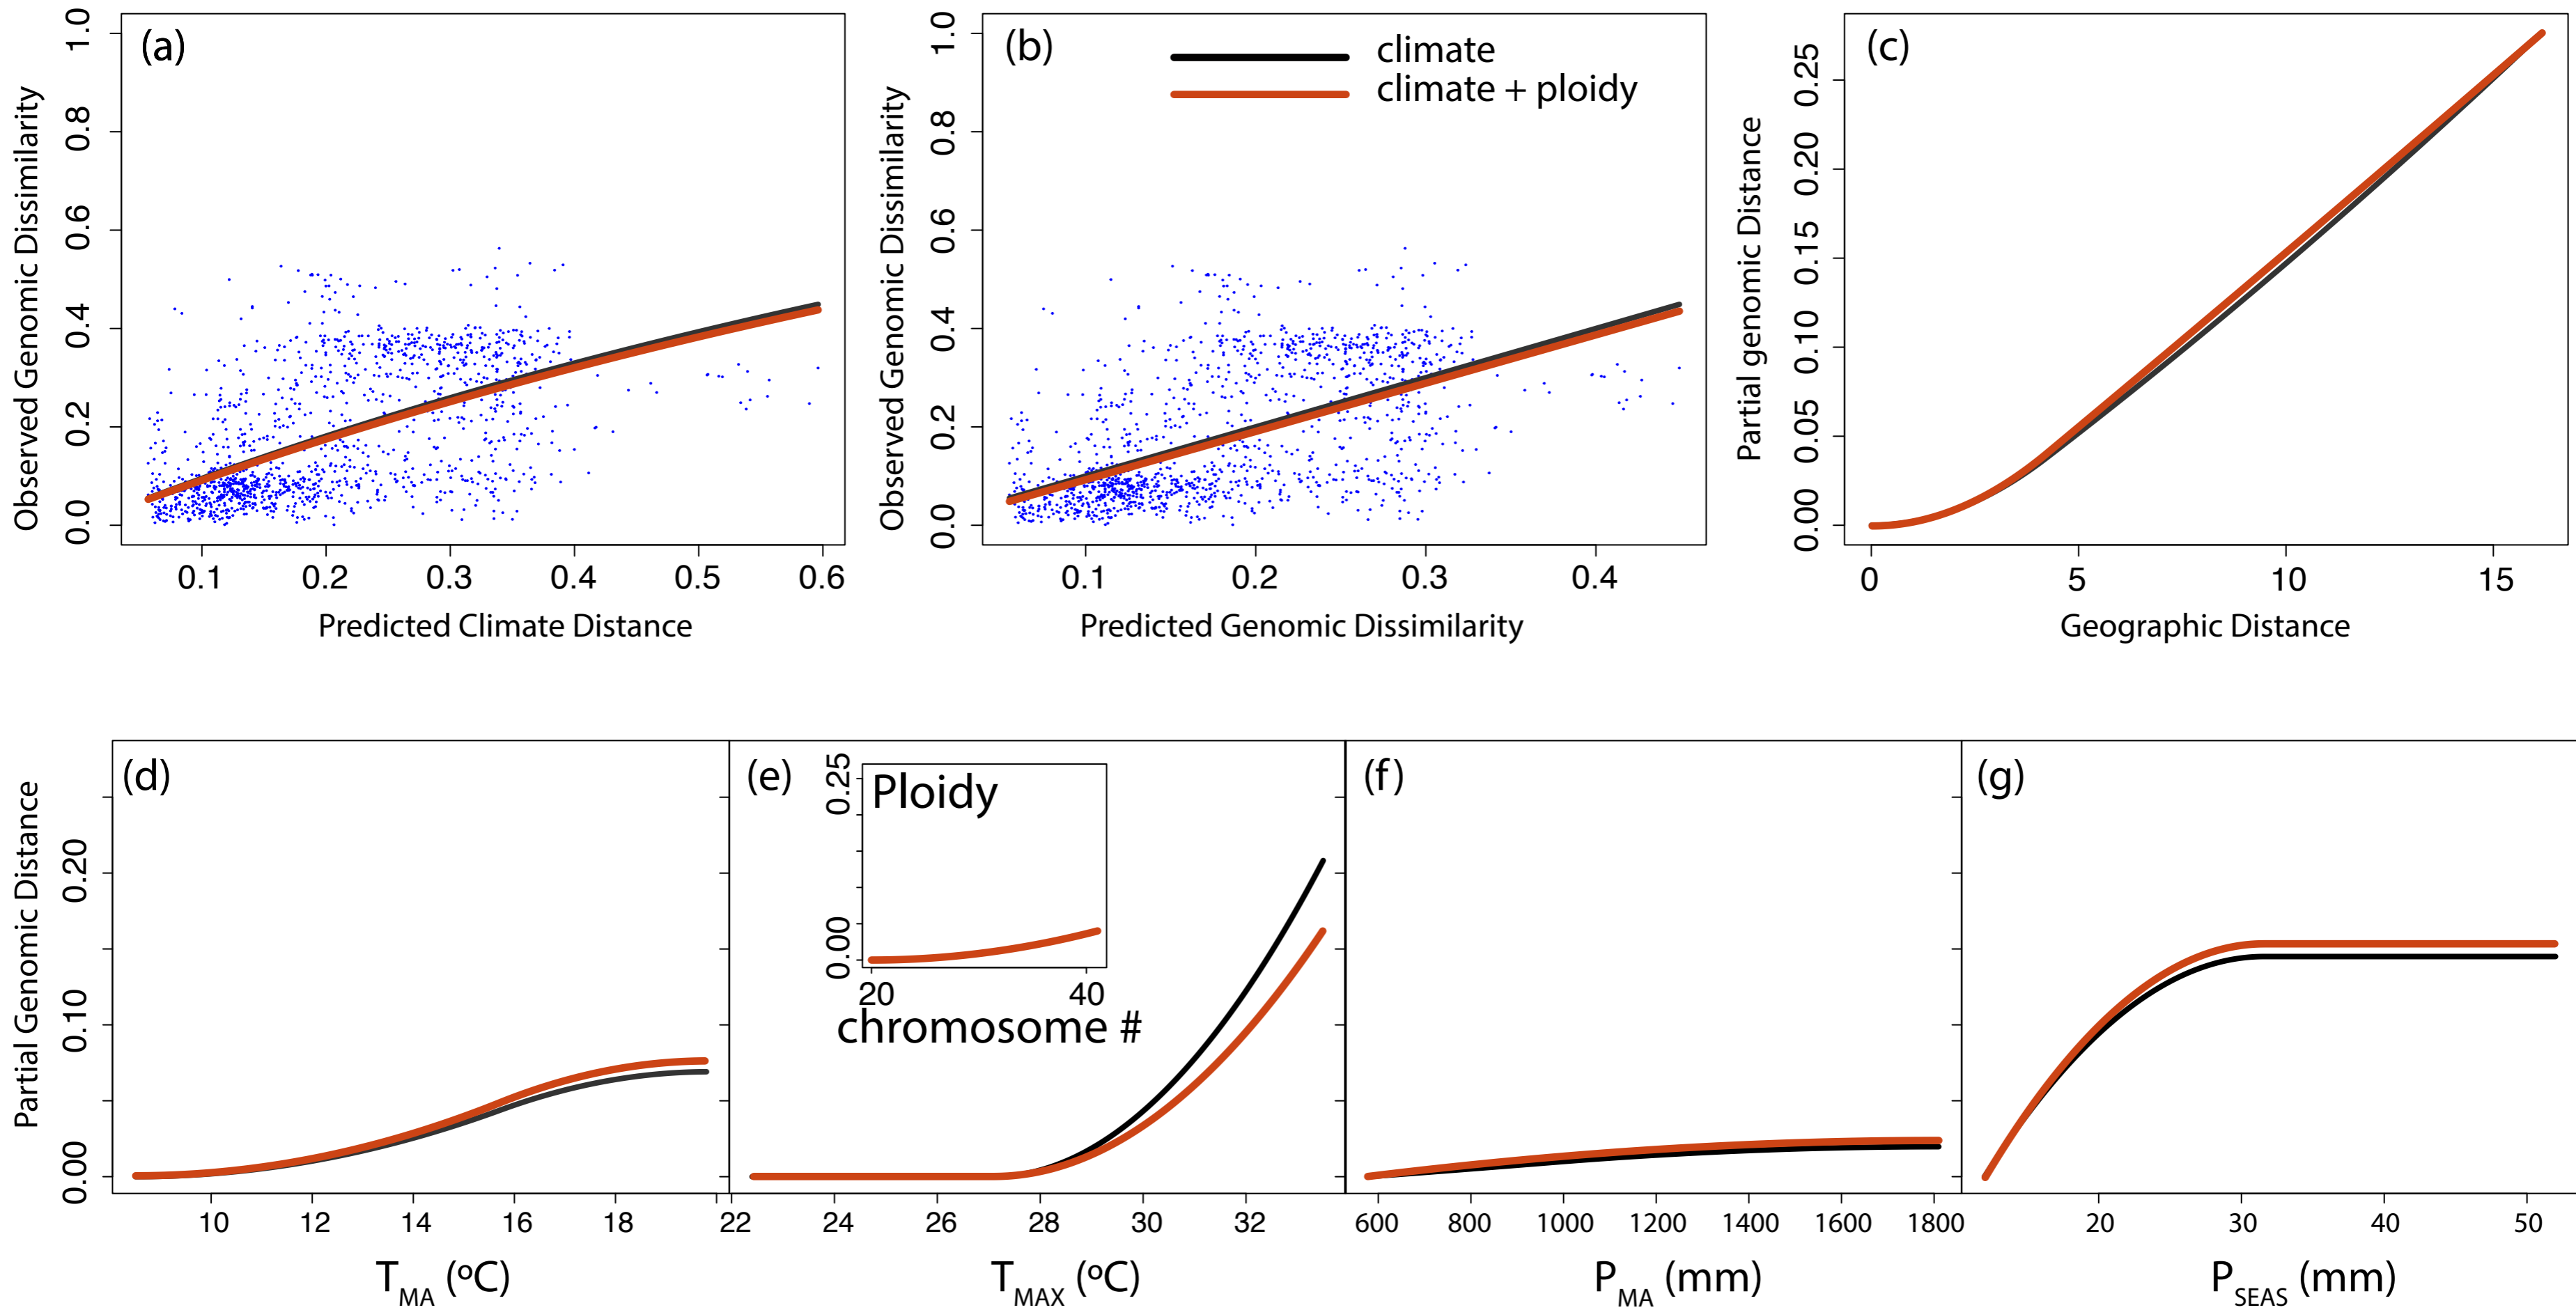

climate variables

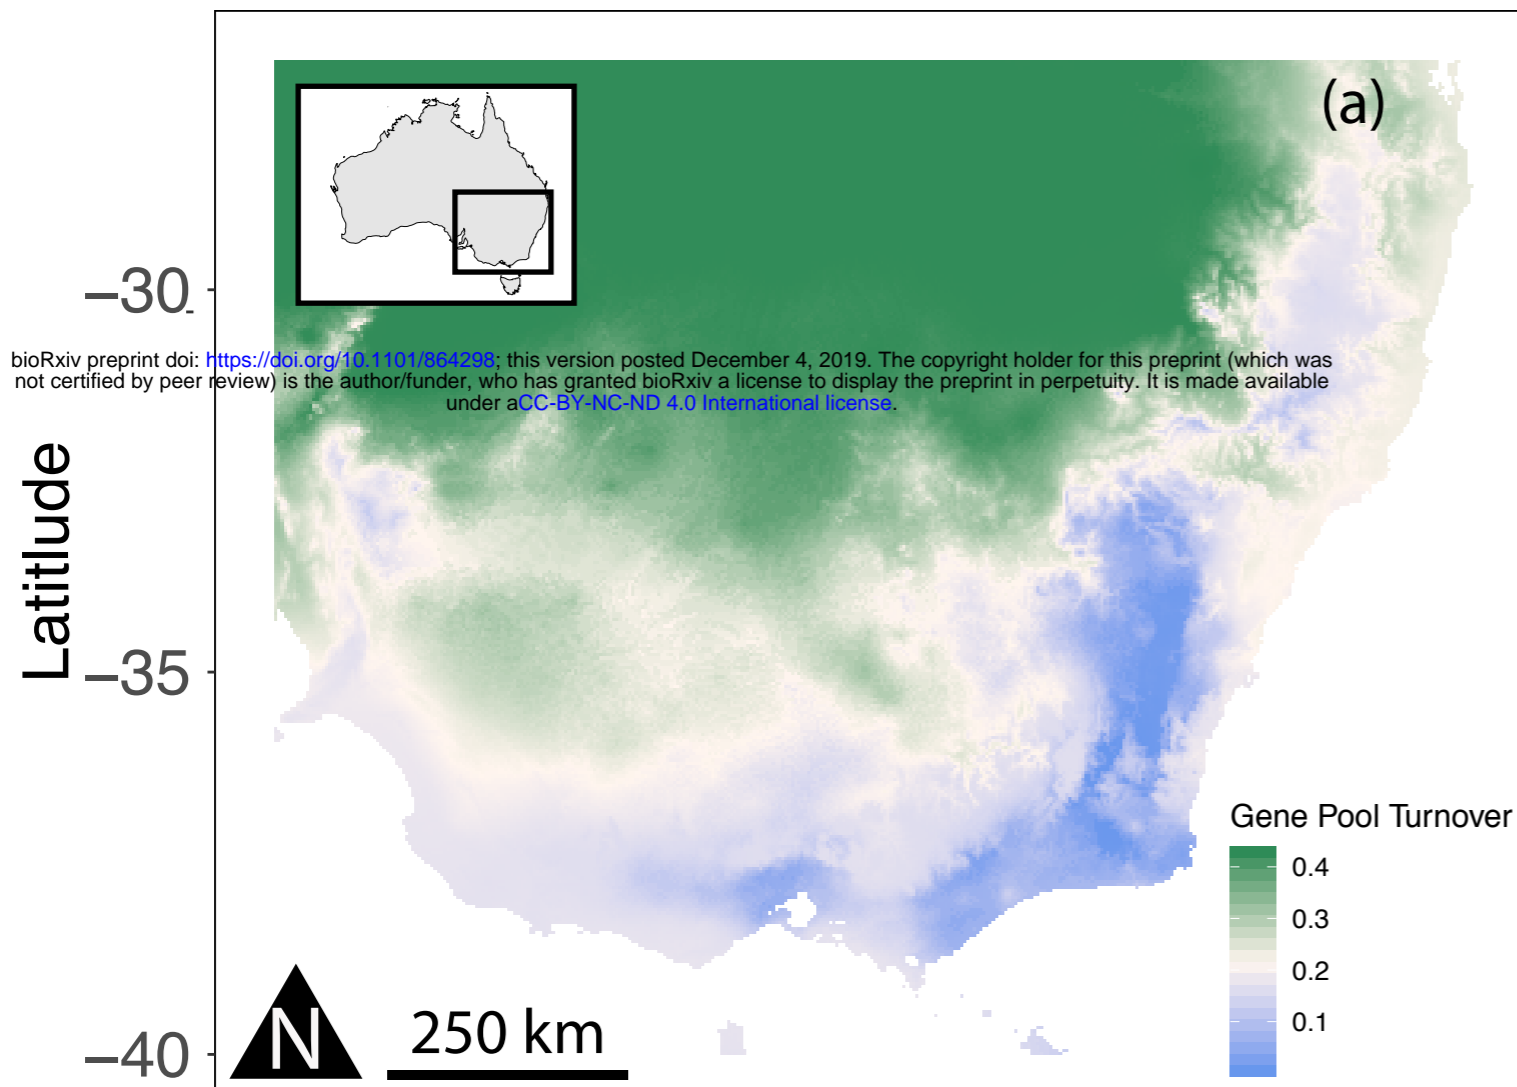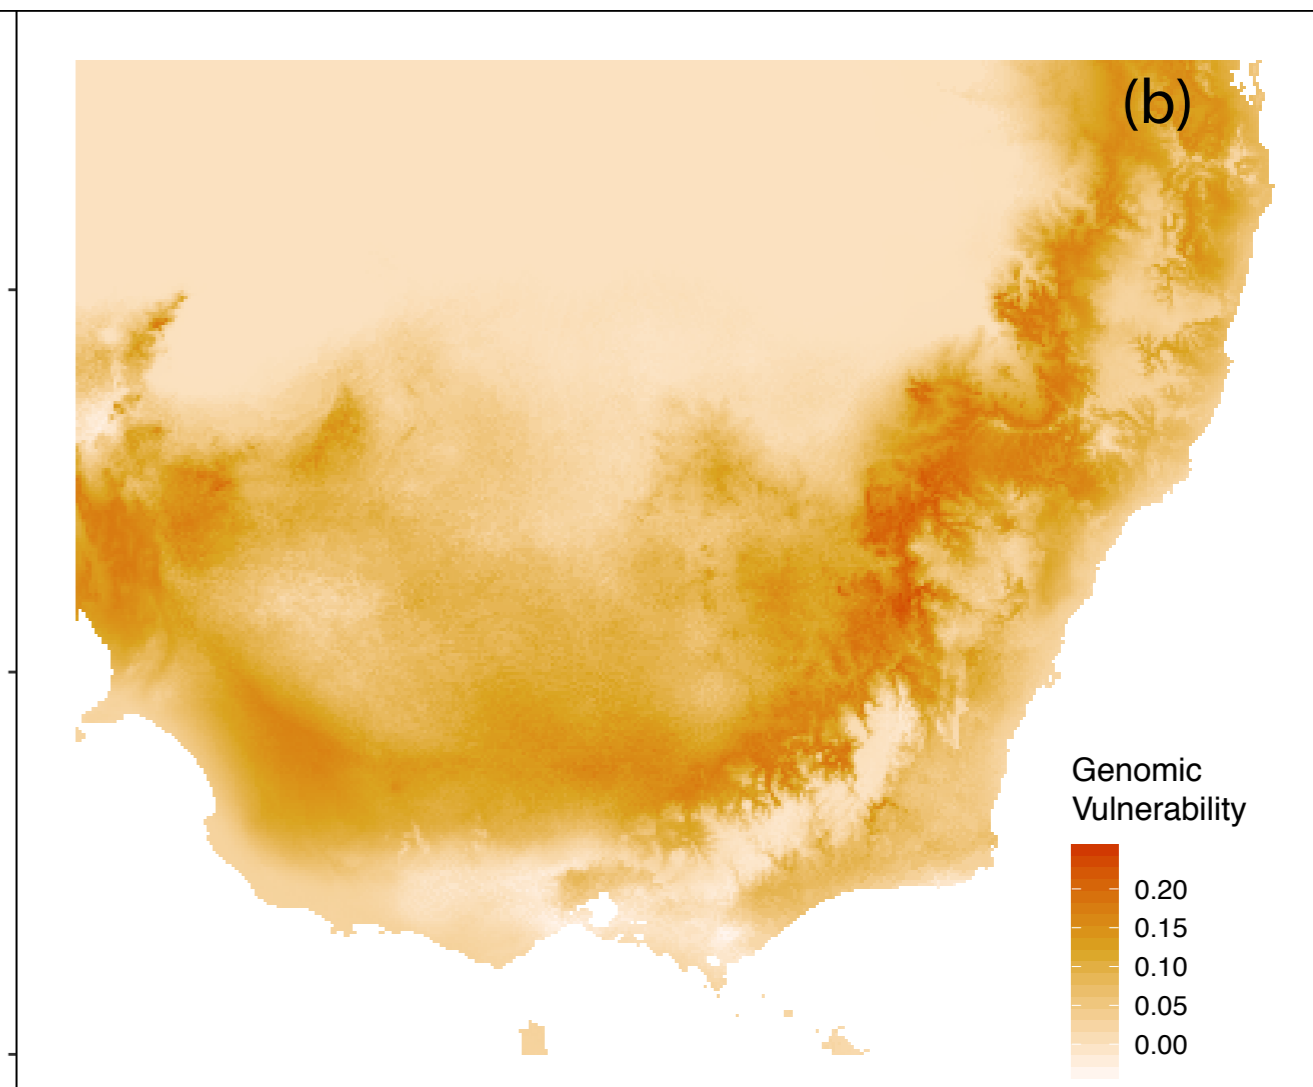

climate + ploidy prediction

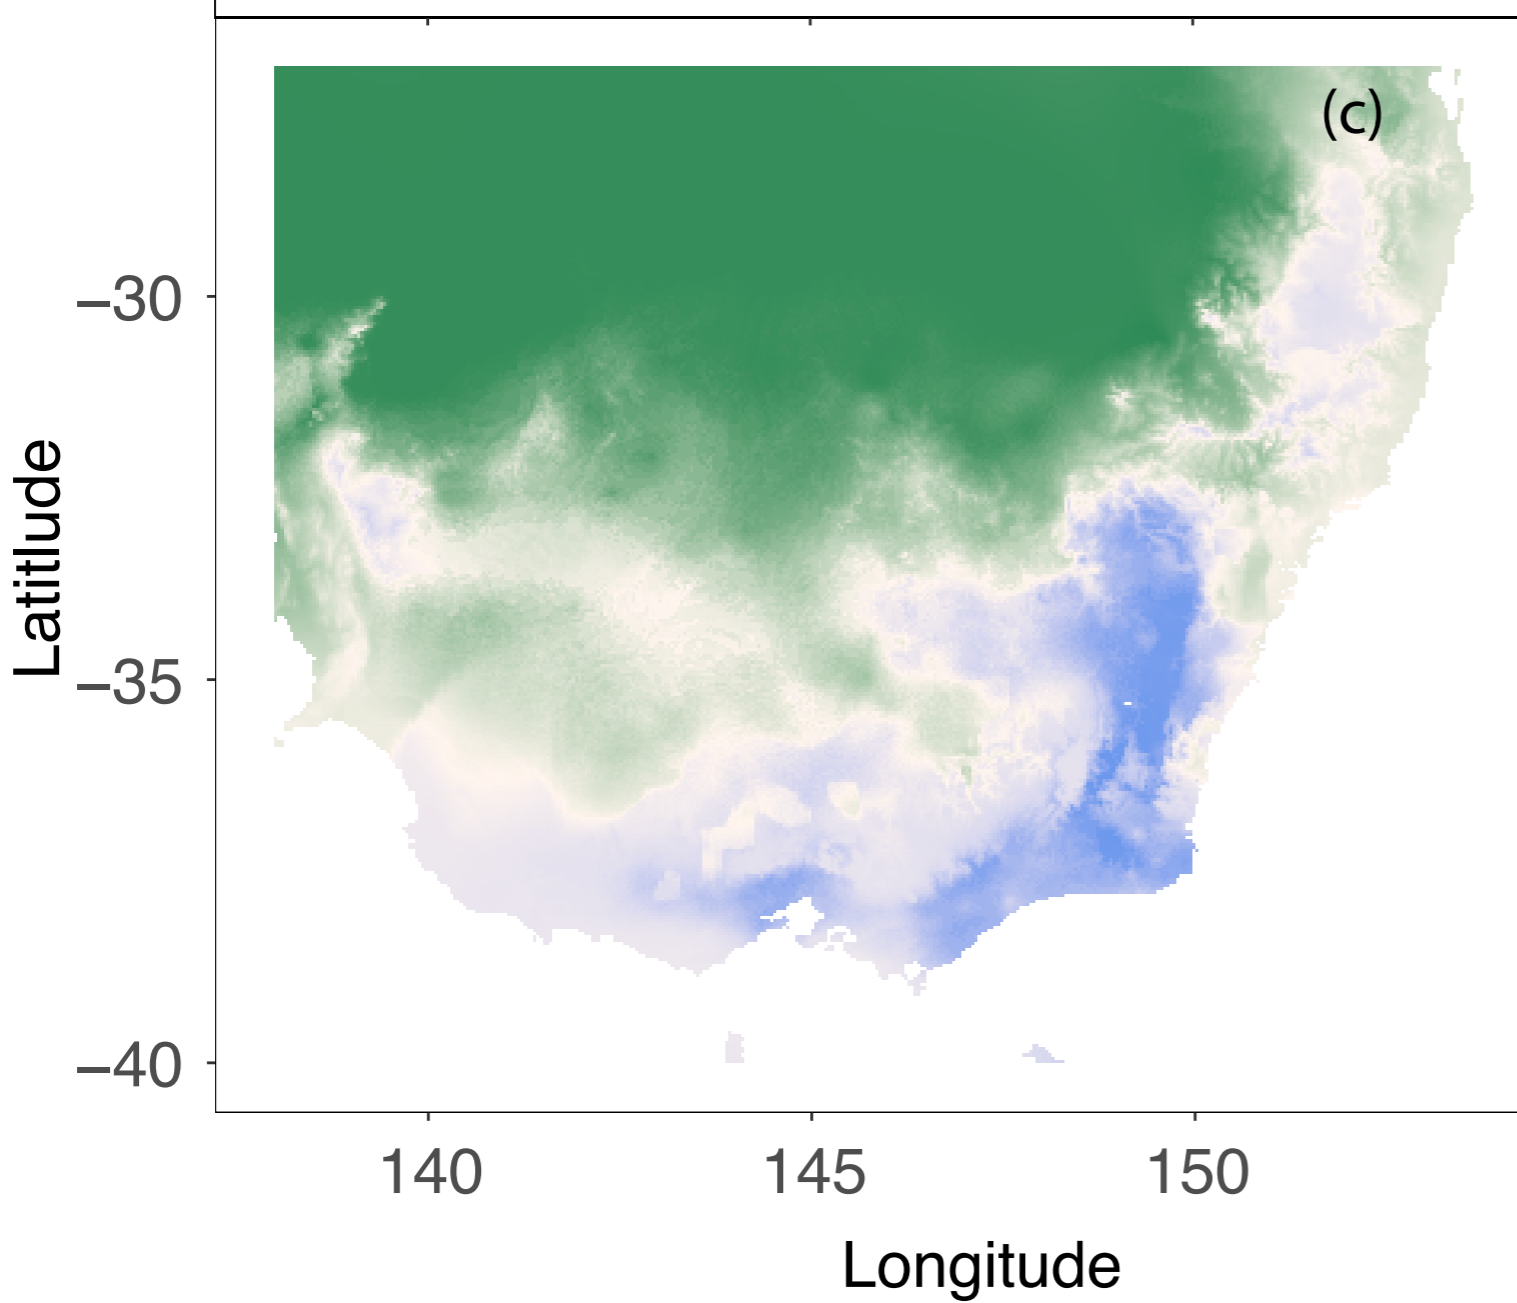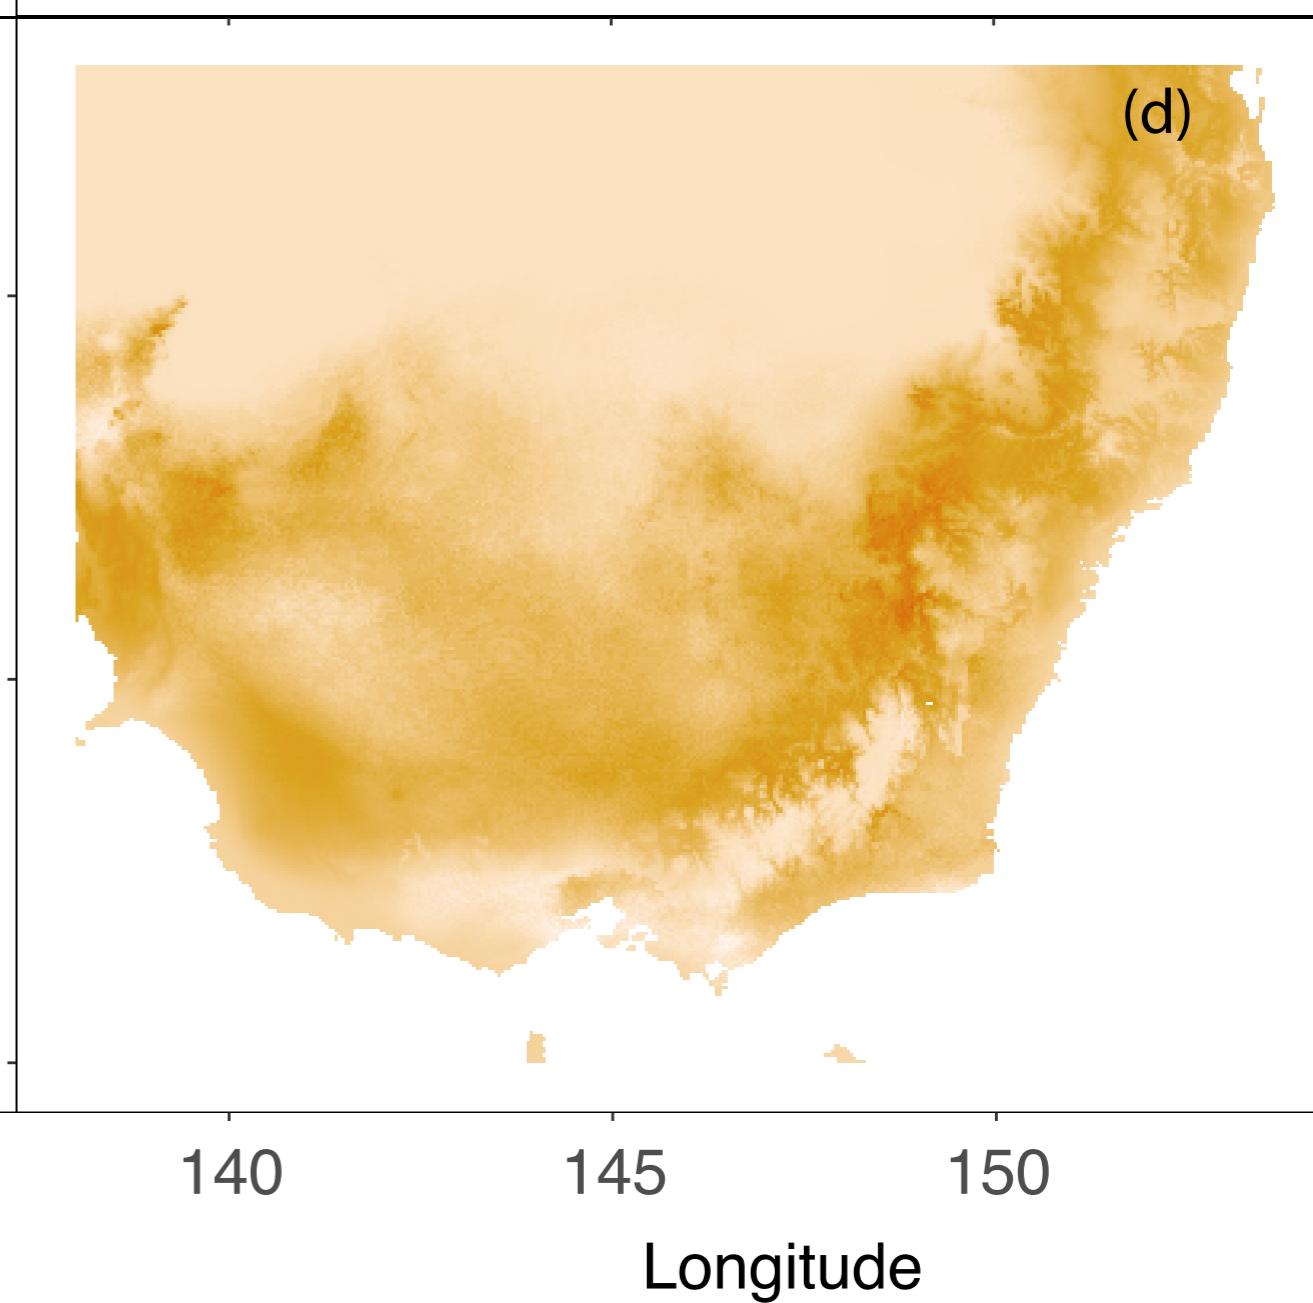

Source: https://www.biorxiv.org/content/10.1101/864298.full.pdf
